# Supplementary material for: ZNF445: a homozygous truncating variant in a patient with Temple syndrome and multilocus imprinting disturbance
Source: PubMed Central journal article supplement (PMC8157728; doi:10.1186/s13148-021-01106-5), 2021-05-26
Supplement: 13148_2021_1106_MOESM1_ESM.pdf [file 13148_2021_1106_MOESM1_ESM.pdf]

**Table S1.** Methylation indices (%) for CpGs determined by pyrosequencing analysis for disease-related iDMRs.

| DMR<br>Genomic position*                                    | CpG | Methylate<br>allele | Character of<br>DMR | Pt. 1 | Father | Mother | Pt. 2 | Pt. 3 | Pt. 4 | Pt. 5 | Pt. 6 | Median<br>(Min ~ Max)† |
|-------------------------------------------------------------|-----|---------------------|---------------------|-------|--------|--------|-------|-------|-------|-------|-------|------------------------|
|                                                             |     |                     |                     |       |        |        |       |       |       |       |       |                        |
| <b>PLAGL1 :alt-TSS-DMR</b><br>chr6:144329214-144329359      | 1   | Maternal            | Oocyte gDMR         | 49    | 49     | 52     | 52    | 40    | 15    | 26    | 52    | 47 (33 ~ 52)           |
|                                                             | 2   |                     |                     | 47    | 46     | 49     | 47    | 40    | 15    | 25    | 49    | 46 (34 ~ 51)           |
|                                                             | 3   |                     |                     | 46    | 50     | 50     | 48    | 47    | 18    | 29    | 50    | 48 (40 ~ 56)           |
|                                                             | 4   |                     |                     | 33    | 38     | 43     | 39    | 35    | 14    | 23    | 40    | 39 (31 ~ 47)           |
|                                                             | 5   |                     |                     | 45    | 45     | 47     | 49    | 46    | 19    | 26    | 53    | 50 (44 ~ 58)           |
|                                                             | 6   |                     |                     | 52    | 51     | 46     | 45    | 46    | 16    | 29    | 51    | 49 (41 ~ 55)           |
|                                                             | 7   |                     |                     | 57    | 53     | 50     | 48    | 48    | 17    | 31    | 54    | 53 (47 ~ 58)           |
| <b>PEG10 :TSS-DMR</b><br>chr7:94285715-94285869             | 1   | Maternal            | Oocyte gDMR         | 54    | 57     | 57     | 56    | 59    | 54    | 51    | 14    | 56 (50 ~ 59)           |
|                                                             | 2   |                     |                     | 53    | 58     | 57     | 56    | 58    | 54    | 52    | 15    | 55 (50 ~ 59)           |
|                                                             | 3   |                     |                     | 52    | 59     | 55     | 54    | 58    | 52    | 51    | 14    | 53 (48 ~ 59)           |
|                                                             | 4   |                     |                     | 52    | 58     | 56     | 55    | 61    | 55    | 54    | 14    | 54.5 (50 ~ 59)         |
|                                                             | 5   |                     |                     | 48    | 51     | 51     | 50    | 53    | 48    | 49    | 15    | 50 (45 ~ 55)           |
| <b>MEST :alt-TSS-DMR</b><br>chr7:130132206-130132348        | 1   | Maternal            | Oocyte gDMR         | 54    | 66     | 61     | 33    | 54    | 56    | 60    | 56    | 60 (56 ~ 70)           |
|                                                             | 2   |                     |                     | 55    | 65     | 61     | 54    | 55    | 56    | 60    | 56    | 59 (55 ~ 69)           |
|                                                             | 3   |                     |                     | 49    | 60     | 59     | 33    | 52    | 54    | 56    | 52    | 58 (52 ~ 68)           |
|                                                             | 4   |                     |                     | 55    | 67     | 63     | 37    | 60    | 57    | 61    | 54    | 61 (42 ~ 73)           |
|                                                             | 5   |                     |                     | 54    | 62     | 59     | 33    | 55    | 56    | 60    | 55    | 57 (47 ~ 66)           |
|                                                             | 6   |                     |                     | 55    | 66     | 62     | 37    | 62    | 57    | 60    | 55    | 60 (54 ~ 70)           |
| <b>HI9/IGF2 :IG-DMR</b><br>chr11:2023224-2023357            | 1   | Paternal            | Sperm gDMR          | 25    | 52     | 51     | 48    | 18    | 55    | 38    | 49    | 51 (48 ~ 54)           |
|                                                             | 2   |                     |                     | 27    | 54     | 53     | 50    | 12    | 56    | 42    | 46    | 51 (45 ~ 57)           |
|                                                             | 3   |                     |                     | 27    | 53     | 54     | 50    | 15    | 58    | 38    | 49    | 54 (49 ~ 58)           |
|                                                             | 4   |                     |                     | 24    | 47     | 48     | 45    | 13    | 51    | 33    | 43    | 47 (43 ~ 51)           |
|                                                             | 5   |                     |                     | 31    | 50     | 50     | 48    | 15    | 55    | 36    | 44    | 50 (46 ~ 54)           |
|                                                             | 6   |                     |                     | 19    | 40     | 42     | 39    | 8     | 45    | 32    | 33    | 41 (36 ~ 46)           |
|                                                             | 7   |                     |                     | 20    | 63     | 61     | 58    | 20    | 62    | 43    | 54    | 60 (57 ~ 63)           |
|                                                             | 8   |                     |                     | 21    | 59     | 55     | 56    | 17    | 60    | 39    | 53    | 58 (54 ~ 60)           |
|                                                             | 9   |                     |                     | 20    | 65     | 61     | 58    | 20    | 64    | 43    | 54    | 61 (57 ~ 65)           |
|                                                             | 10  |                     |                     | 19    | 60     | 57     | 57    | 20    | 60    | 41    | 50    | 58 (55 ~ 61)           |
|                                                             | 11  |                     |                     | 18    | 57     | 55     | 54    | 19    | 57    | 39    | 48    | 55 (52 ~ 57)           |
|                                                             | 12  |                     |                     | 19    | 64     | 60     | 61    | 18    | 62    | 43    | 56    | 60 (56 ~ 64)           |
|                                                             | 13  |                     |                     | 15    | 46     | 43     | 45    | 13    | 49    | 34    | 38    | 47 (43 ~ 49)           |
| <b>KCNQ1OT1 :TSS-DMR</b><br>chr11:2720333-2720487           | 1   | Maternal            | Oocyte gDMR         | 53    | 52     | 50     | 9     | 54    | 10    | 55    | 15    | 58 (49 ~ 66)           |
|                                                             | 2   |                     |                     | 54    | 53     | 50     | 11    | 56    | 10    | 58    | 19    | 61 (52 ~ 68)           |
|                                                             | 3   |                     |                     | 47    | 48     | 47     | 9     | 49    | 9     | 48    | 14    | 48 (41 ~ 54)           |
|                                                             | 4   |                     |                     | 48    | 49     | 47     | 9     | 52    | 8     | 50    | 14    | 48 (42 ~ 55)           |
|                                                             | 5   |                     |                     | 58    | 57     | 57     | 12    | 60    | 10    | 56    | 18    | 67 (55 ~ 72)           |
|                                                             | 6   |                     |                     | 57    | 54     | 57     | 10    | 58    | 10    | 55    | 15    | 64 (55 ~ 71)           |
| <b>MEG3/DLK1 :IG-DMR (CG4)</b><br>chr14:101275613-101275776 | 1   | Paternal            | Sperm gDMR          | 50    | 66     | 64     | 66    | 53    | 59    | 39    | 60    | 58 (49 ~ 68)           |
|                                                             | 2   |                     |                     | 44    | 58     | 57     | 54    | 50    | 62    | 32    | 53    | 54 (40 ~ 62)           |
|                                                             | 3   |                     |                     | 78    | 73     | 74     | 72    | 66    | 78    | 54    | 67    | 68 (54 ~ 78)           |
|                                                             | 4   |                     |                     | 41    | 56     | 55     | 56    | 50    | 52    | 31    | 51    | 53.5 (43 ~ 64)         |
| <b>MEG3 :TSS-DMR (CG7)</b><br>chr14:101292170-101292336     | 1   | Paternal            | Secondary DMR       | 2     | 50     | 48     | 48    | 48    | 48    | 26    | 48    | 52 (43 ~ 56)           |
|                                                             | 2   |                     |                     | 3     | 51     | 54     | 50    | 51    | 49    | 28    | 48    | 55 (52 ~ 65)           |
|                                                             | 3   |                     |                     | 4     | 50     | 50     | 36    | 49    | 48    | 27    | 47    | 37 (32 ~ 55)           |
|                                                             | 4   |                     |                     | 7     | 54     | 58     | 49    | 52    | 51    | 30    | 51    | 60 (44 ~ 74)           |
|                                                             | 5   |                     |                     | 2     | 46     | 46     | 33    | 42    | 42    | 24    | 44    | 36 (26 ~ 47)           |
| <b>SNURF :TSS-DMR</b><br>chr15:25200788-25200897            | 1   | Maternal            | Oocyte gDMR         | 51    | 52     | 57     | 56    | 52    | 54    | 55    | 46    | 55 (50 ~ 60)           |
|                                                             | 2   |                     |                     | 47    | 49     | 46     | 50    | 47    | 48    | 51    | 41    | 49 (44 ~ 54)           |
|                                                             | 3   |                     |                     | 51    | 51     | 53     | 52    | 49    | 49    | 52    | 41    | 51 (46 ~ 57)           |
|                                                             | 4   |                     |                     | 51    | 52     | 49     | 52    | 48    | 49    | 51    | 41    | 52 (47 ~ 57)           |
|                                                             | 5   |                     |                     | 63    | 61     | 58     | 65    | 64    | 61    | 60    | 55    | 63 (58 ~ 68)           |
| <b>GNAS A/B :TSS-DMR</b><br>chr20:57463531-57463746         | 1   | Maternal            | Secondary DMR       | 42    | 45     | 42     | 12    | 45    | 42    | 44    | 41    | 41 (34 ~ 45)           |
|                                                             | 2   |                     |                     | 41    | 45     | 41     | 13    | 52    | 41    | 42    | 45    | 40 (33 ~ 45)           |
|                                                             | 3   |                     |                     | 43    | 47     | 44     | 14    | 51    | 42    | 45    | 45    | 43 (35 ~ 47)           |
|                                                             | 4   |                     |                     | 39    | 41     | 40     | 13    | 45    | 39    | 42    | 41    | 38 (32 ~ 42)           |
|                                                             | 5   |                     |                     | 41    | 45     | 42     | 14    | 49    | 41    | 44    | 42    | 40 (33 ~ 45)           |
|                                                             | 6   |                     |                     | 38    | 41     | 40     | 13    | 44    | 39    | 39    | 42    | 38 (31 ~ 42)           |
|                                                             | 7   |                     |                     | 40    | 43     | 41     | 12    | 51    | 41    | 42    | 45    | 40 (32 ~ 44)           |
| <b>Clinical diagnosis</b>                                   |     |                     |                     | TS14‡ | Normal | Normal | BWS+  | SRS   | BWS   | SRS   | BWS   |                        |
| <b>Reference</b>                                            |     |                     |                     | 1     |        |        | 2     |       |       |       |       |                        |

The methods for pyrosequencing have been described previously,<sup>1</sup> and primers utilized in this study are shown in Table S2.

Abbreviations: DMR, differentially methylated region; gDMR, germline DMR; TS14, Temple syndrome; SRS, Silver-Russell syndrome; PHPIb, pseudohypoparathyroidism type Ib; and BWS, Beckwith-Wiedemann syndrome.

\* According to GRCh37/hg19.

† Reference data obtained from 50 control subjects.

‡ TS14-compatible phenotype in infancy to early childhood, *i.e.*, coexistence of typical SRS phenotype satisfying all the six Netchine-Harison scoring system features and marked hypotonia characteristic of Prader-Willi syndrome at 4 5/12 years of age.

§ Co-existence of clinically recognizable BWS and PHPIb phenotypes.

Methylation indices above and below the reference ranges are highlighted with light orange and light blue, respectively.

## References

- Kagami M, Yanagisawa A, Ota M, Matsuoka K, Nakamura A, Matsubara K, et al. Temple syndrome in a patient with variably methylated CpGs at the primary MEG3/DLK1:IG-DMR and severely hypomethylated CpGs at the secondary MEG3:TSS-DMR. *Clin Epigenetics*. 2019;11:42.
- Sano S, Matsubara K, Nagasaki K, Kikuchi T, Nakabayashi K, Hata K, et al. Beckwith-Wiedemann syndrome and pseudohypoparathyroidism type Ib in a patient with multilocus imprinting disturbance: a female-dominant phenomenon? *J Hum Genet*. 2016;61:765–69.
