# Supplementary material for: ZNF445: a homozygous truncating variant in a patient with Temple syndrome and multilocus imprinting disturbance
Source: PubMed Central journal article supplement (PMC8157728; doi:10.1186/s13148-021-01106-5), 2021-05-26
Supplement: 13148_2021_1106_MOESM2_ESM.pdf [file 13148_2021_1106_MOESM2_ESM.pdf]

**Table S2.** Assessment of consanguinity based on PI\_HAT values calculated by PLINK

| Family      | IID1    | IID2   | Z0     | Z1     | Z2 | PI_HAT |
|-------------|---------|--------|--------|--------|----|--------|
| This family | Patient | Father | 0      | 1      | 0  | 0.5    |
|             | Patient | Mother | 0      | 1      | 0  | 0.5    |
|             | Father  | Mother | 1      | 0      | 0  | 0      |
| Reference*  | Child   | Father | 0      | 1      | 0  | 0.5    |
|             | Child   | Mother | 0      | 1      | 0  | 0.5    |
|             | Father  | Mother | 0.7598 | 0.2402 | 0  | 0.1201 |

A total of 5,123 common exonic variants have been analyzed by PLINK 1.9 beta (<https://www.cog-genomics.org/plink/1.9/>).

IID1: Individual ID for first individual; IID2: Individual ID for second individual; Z0: P(IBD=0) (IBD: identity by descent); Z1: P(IBD=1); Z2: P(IBD=2); and PI\_HAT:  $P(\text{IBD}=2)+0.5 \cdot P(\text{IBD}=1)$  (proportion IBD).

Theoretical PI\_HAT values: 1.0 for the same individual or monozygotic twins; 0.5 for first-degree relatives; 0.25 for second-degree relatives, 0.125 for third-degree relatives, and 0 for unrelated individuals.

\*For a reference, PI\_HAT values have been calculated for a family in which the parents were first cousins (third-degree relatives). The value of 0.1201 is similar to the expected value of 0.125.

### Reference

Purcell S, Neale B, Todd-Brown K, Thomas L, Ferreira MAR, Bender D, et al. PLINK: A tool set for whole-genome association and population-based linkage analyses. *Am J Hum Genet.* 2007;81:559–75.
