# Supplementary material for: ZNF445: a homozygous truncating variant in a patient with Temple syndrome and multilocus imprinting disturbance
Source: PubMed Central journal article supplement (PMC8157728; doi:10.1186/s13148-021-01106-5), 2021-05-26
Supplement: 13148_2021_1106_MOESM3_ESM.pdf [file 13148_2021_1106_MOESM3_ESM.pdf]

**Table S3. Methylation values of 855 probes (CpGs) on differentially methylated regions, measured by Infinium MethylationEPIC Kit.**

| Chr. | Genomic position | Target ID  | Name of DMRs   | 450K probes | Mean $\beta$ values in controls | SD          | Mean - 3 SD  | Mean + 3 SD | $\beta$ values Patient | Delta- $\beta$ Patient | $\beta$ values Father | Delta- $\beta$ Father | $\beta$ values Mother | Delta- $\beta$ Mother |
|------|------------------|------------|----------------|-------------|---------------------------------|-------------|--------------|-------------|------------------------|------------------------|-----------------------|-----------------------|-----------------------|-----------------------|
| 1    | 36915841         | cg27439456 | OSCP1          | Yes         | 0.193439981                     | 0.065998658 | -0.004555993 | 0.391435955 | 0.162212301            | -0.022982523           | 0.164328363           | -0.020182129          | 0.229963009           | 0.045452455           |
| 1    | 36915865         | cg08878450 | OSCP1          | Yes         | 0.417937518                     | 0.08264052  | 0.170015959  | 0.665859077 | 0.388105273            | -0.010819845           | 0.337544032           | -0.061381085          | 0.552496077           | 0.15402449            |
| 1    | 36916006         | cg10914277 | OSCP1          | Yes         | 0.041453072                     | 0.007097445 | 0.012006737  | 0.062745407 | 0.034926573            | -0.00311173            | 0.034926573           | -0.005191616          | 0.044919078           | 0.003844289           |
| 1    | 36916013         | cg16583330 | OSCP1          | Yes         | 0.015857457                     | 0.004372236 | 0.002275748  | 0.028989166 | 0.015089673            | -0.000296723           | 0.015627971           | -0.000286575          | 0.008937022           | -0.006449374          |
| 1    | 36916040         | cg10035922 | OSCP1          | Yes         | 0.00610117                      | 0.001955756 | 0.000243442  | 0.011958898 | 0.003893416            | -0.001902997           | 0.005514626           | -0.000281787          | 0.000907035           | -0.001895678          |
| 1    | 36916160         | cg00578252 | OSCP1          | Yes         | 0.013048481                     | 0.00293805  | 0.004234332  | 0.02186263  | 0.011969365            | -0.000439884           | 0.010863368           | -0.001545881          | 0.010691374           | -0.001171874          |
| 1    | 36916165         | cg11708976 | OSCP1          | Yes         | 0.002685999                     | 0.00113309  | -0.000713272 | 0.006085269 | 0.002844009            | -0.000242155           | 0.001335501           | -0.000262753          | 0.006069906           | 0.7165158-05          |
| 1    | 36916179         | cg15725228 | OSCP1          | Yes         | 0.013622069                     | 0.00280758  | 0.00519933   | 0.022044808 | 0.010229475            | -0.003037942           | 0.010715863           | -0.002551555          | 0.013107167           | -0.00016025           |
| 1    | 36916191         | cg09662887 | OSCP1          | Yes         | 0.01370958                      | 0.006680768 | -0.006332724 | 0.033751884 | 0.015185413            | 0.002749353            | 0.011033188           | -0.001402872          | 0.008867687           | -0.003568373          |
| 1    | 36916194         | cg06367472 | OSCP1          | Yes         | 0.006344305                     | 0.001468057 | 0.001940135  | 0.010748476 | 0.005109455            | -0.001013667           | 0.005109455           | -0.00011515           | 0.004696409           | -0.001426713          |
| 1    | 36916196         | cg12630409 | OSCP1          | Yes         | 0.020766104                     | 0.003705575 | 0.009649378  | 0.03188283  | 0.018813055            | -0.001126901           | 0.023033955           | -0.003093999          | 0.019182835           | -0.000757122          |
| 1    | 36916502         | cg22397854 | OSCP1          | Yes         | 0.008641881                     | 0.002616505 | 0.000792368  | 0.016491395 | 0.008228236            | -0.000197942           | 0.006811316           | -0.001614861          | 0.007460897           | -0.000965281          |
| 1    | 36916606         | cg03954991 | OSCP1          | Yes         | 0.097806653                     | 0.035820005 | -0.009653363 | 0.205266669 | 0.061239378            | -0.033693625           | 0.06101903            | -0.033913972          | 0.162365588           | 0.064325886           |
| 1    | 40024972         | cg10243676 | PIIEXL:Ex1-DMR | Yes         | 0.664496286                     | 0.049027564 | 0.517413595  | 0.811578977 | 0.629505458            | -0.003632491           | 0.684304935           | -0.051166986          | 0.723651498           | 0.090513555           |
| 1    | 40025233         | cg11704876 | PIIEXL:Ex1-DMR | Yes         | 0.736911929                     | 0.052622943 | 0.579043099  | 0.894780758 | 0.7374741803           | 0.033708557            | 0.728285211           | 0.024251965           | 0.784397523           | 0.080346277           |
| 1    | 40025412         | cg22862450 | PIIEXL:Ex1-DMR | Yes         | 0.830563697                     | 0.031083953 | 0.737311838  | 0.923815557 | 0.815661066            | 0.022112524            | 0.807391815           | 0.013843237           | 0.868020801           | 0.074722578           |
| 1    | 40025416         | cg15057250 | PIIEXL:Ex1-DMR | Yes         | 0.849652267                     | 0.035854201 | 0.742089663  | 0.972148711 | 0.817011119            | 0.005256765            | 0.867310468           | 0.055561614           | 0.878659986           | 0.066905632           |
| 1    | 55271674         | cg21872908 | Clorf17        | Yes         | 0.97651074                      | 0.008548325 | 0.950865766  | 1.002155715 | 0.971560705            | 0.038170561            | 0.974205262           | 0.038154919           | 0.987883307           | 0.052943164           |
| 1    | 68512540         | cg03641225 | DIRAS3:Ex2-DMR | Yes         | 0.32374034                      | 0.039248731 | 0.205994147  | 0.441486534 | 0.272433587            | -0.034170818           | 0.298730007           | -0.007874398          | 0.447866799           | 0.141272274           |
| 1    | 68512808         | cg20149168 | DIRAS3:Ex2-DMR | Yes         | 0.675861738                     | 0.0575393   | 0.503243839  | 0.848479638 | 0.611448525            | -0.030030994           | 0.679895252           | 0.038415733           | 0.822782937           | 0.181303418           |
| 1    | 68512929         | cg00448707 | DIRAS3:Ex2-DMR | Yes         | 0.747525614                     | 0.047213546 | 0.605884975  | 0.89166253  | 0.706765387            | -0.005464637           | 0.727451287           | -0.015221263          | 0.874149028           | 0.16191905            |
| 1    | 68513064         | cg21808053 | DIRAS3:Ex2-DMR | Yes         | 0.475449637                     | 0.052537588 | 0.318736874  | 0.630623999 | 0.444750504            | -0.006646688           | 0.415269577           | -0.005324482          | 0.604032148           | 0.19291004            |
| 1    | 68515789         | cg02317907 | DIRAS3:TSS-DMR | Yes         | 0.794813455                     | 0.029373037 | 0.706694345  | 0.882932564 | 0.790869355            | 0.031189742            | 0.793642929           | 0.03396316            | 0.792244249           | 0.032564366           |
| 1    | 68515873         | cg17943391 | DIRAS3:TSS-DMR | Yes         | 0.460785155                     | 0.047355258 | 0.318719381  | 0.60285093  | 0.435355243            | -0.001728827           | 0.490251075           | 0.033167005           | 0.485355939           | 0.048271868           |
| 1    | 68515978         | cg19114595 | DIRAS3:TSS-DMR | Yes         | 0.767041149                     | 0.034165681 | 0.665444106  | 0.869538192 | 0.741980559            | 0.009977039            | 0.766013411           | 0.034009891           | 0.751021283           | 0.19107763            |
| 1    | 68516081         | cg12070746 | DIRAS3:TSS-DMR | Yes         | 0.515116616                     | 0.042619476 | 0.426158189  | 0.692750044 | 0.455925484            | -0.034663112           | 0.528404841           | 0.034216245           | 0.538644681           | 0.058062625           |
| 1    | 68516102         | cg16314899 | DIRAS3:TSS-DMR | Yes         | 0.704511094                     | 0.048367328 | 0.55940911   | 0.849613077 | 0.648249071            | -0.02980238            | 0.761115484           | -0.008981675          | 0.695057218           | 0.23827900            |
| 1    | 68516139         | cg25755905 | DIRAS3:TSS-DMR | Yes         | 0.511188161                     | 0.045830092 | 0.36779888   | 0.648678438 | 0.456663291            | -0.028777356           | 0.489595387           | -0.0511384            | 0.59510597            | 0.073665849           |
| 1    | 68516273         | cg22500004 | DIRAS3:TSS-DMR | Yes         | 0.713508053                     | 0.042016139 | 0.587459635  | 0.839556471 | 0.65435697             | -0.027410304           | 0.755540238           | 0.073772964           | 0.707109346           | 0.025342072           |
| 1    | 68516280         | cg05949203 | DIRAS3:TSS-DMR | Yes         | 0.660755468                     | 0.03248297  | 0.563306559  | 0.758204377 | 0.595062925            | -0.036289307           | 0.676495197           | 0.045142965           | 0.668853242           | 0.057241011           |
| 1    | 68516375         | cg19694923 | DIRAS3:TSS-DMR | NA          | 0.563736671                     | 0.03399298  | 0.461757732  | 0.657156111 | 0.537239273            | -0.001700863           | 0.585825063           | 0.046884927           | 0.586683393           | 0.021742506           |
| 1    | 68516454         | cg05932265 | DIRAS3:TSS-DMR | NA          | 0.616051106                     | 0.042130167 | 0.489660605  | 0.72446017  | 0.59269476             | -0.028634124           | 0.64930083            | 0.06139723            | 0.62692473            | 0.03902113            |
| 1    | 68516464         | cg06191076 | DIRAS3:TSS-DMR | NA          | 0.608674398                     | 0.041047154 | 0.485532935  | 0.73181586  | 0.583110527            | -0.003025634           | 0.5944587             | 0.014553807           | 0.646515586           | 0.066071092           |
| 1    | 68516519         | cg13208159 | DIRAS3:TSS-DMR | Yes         | 0.539499662                     | 0.050705931 | 0.387381869  | 0.681617455 | 0.497939064            | -0.016201545           | 0.572301854           | 0.058116245           | 0.546212352           | 0.032071743           |
| 1    | 68516714         | cg13099417 | DIRAS3:TSS-DMR | Yes         | 0.702774361                     | 0.06885553  | 0.562717702  | 0.84293102  | 0.704153332            | 0.032335088            | 0.668661615           | -0.00315663           | 0.769346996           | 0.09528451            |
| 1    | 68517178         | cg27456511 | DIRAS3:TSS-DMR | Yes         | 0.686387453                     | 0.044128004 | 0.554025042  | 0.818749864 | 0.523210664            | -0.131356512           | 0.73438218            | 0.079815025           | 0.724060011           | 0.049628256           |
| 1    | 68517206         | cg16148134 | DIRAS3:TSS-DMR | Yes         | 0.526493991                     | 0.062519184 | 0.33894025   | 0.714047733 | 0.302176999            | -0.162694364           | 0.575833119           | -0.072601757          | 0.562853344           | 0.060081981           |
| 1    | 68517256         | cg13605615 | DIRAS3:TSS-DMR | Yes         | 0.477543356                     | 0.068517368 | 0.301991254  | 0.653095459 | 0.334767555            | -0.119480449           | 0.50056949            | 0.046708745           | 0.528300118           | 0.074429214           |
| 1    | 68517274         | cg10038185 | DIRAS3:TSS-DMR | Yes         | 0.547265804                     | 0.049779927 | 0.432262024  | 0.72205584  | 0.343336985            | -0.179544888           | 0.614669738           | -0.07788264           | 0.59633284            | 0.073451367           |
| 1    | 68517437         | cg14230016 | DIRAS3:TSS-DMR | NA          | 0.630985563                     | 0.045184254 | 0.4954328    | 0.766538326 | 0.519446412            | -0.084274676           | 0.648145177           | 0.044424089           | 0.663736951           | 0.06015863            |
| 1    | 68517455         | cg01547550 | DIRAS3:TSS-DMR | NA          | 0.591609114                     | 0.039653343 | 0.47249084   | 0.705619144 | 0.403391911            | -0.055434652           | 0.591201732           | -0.025327888          | 0.66767235            | 0.061798506           |
| 1    | 68517463         | cg14059179 | DIRAS3:TSS-DMR | NA          | 0.517425305                     | 0.040261123 | 0.396641935  | 0.60380675  | 0.42329104             | -0.071463919           | 0.551690388           | -0.056934259          | 0.534251804           | 0.03949645            |
| 1    | 92414521         | cg03421440 | BRDT           | Yes         | 0.927406767                     | 0.029558715 | 0.838730624  | 1.016280911 | 0.929087651            | 0.04157273             | 0.901127777           | 0.013612856           | 0.95852457            | 0.051337536           |
| 1    | 92414723         | cg14732540 | BRDT           | Yes         | 0.683304968                     | 0.08392346  | 0.43150931   | 0.935102005 | 0.607920099            | -0.042096938           | 0.609746617           | -0.040270419          | 0.775954168           | 0.125937132           |
| 1    | 92414723         | cg14732540 | BRDT           | Yes         | 0.683304968                     | 0.08392346  | 0.43150931   | 0.935102005 | 0.607920099            | -0.042096938           | 0.609746617           | -0.040270419          | 0.775954168           | 0.125937132           |
| 1    | 92414723         | cg14732540 | BRDT           | Yes         | 0.683304968                     | 0.08392346  | 0.43150931   | 0.935102005 | 0.607920099            | -0.042096938           | 0.609746617           | -0.040270419          | 0.775954168           | 0.125937132           |
| 1    | 95689855         | cg24808901 | LOC101928118   | Yes         | 0.818137791                     | 0.059113219 | 0.640798135  | 0.995477447 | 0.791194518            | -0.008008625           | 0.747983301           | -0.005202592          | 0.83567969            | 0.047093797           |
| 1    | 95699038         | cg26537280 | LOC101928118   | Yes         | 0.488411373                     | 0.088266019 | 0.223613316  | 0.75320943  | 0.495168286            | 0.030148472            | 0.394625084           | -0.07039473           | 0.50356084            | 0.08353627            |
| 1    | 95699098         | cg03123541 | LOC101928118   | Yes         | 0.65618013                      | 0.10119184  | 0.352122579  | 0.99237682  | 0.635617385            | -0.008857785           | 0.551360366           | -0.072299234          | 0.734964268           | 0.03704668            |
| 1    | 95699314         | cg06440946 | LOC101928118   | Yes         | 0.060378632                     | 0.008938669 | -0.026572375 | 0.14732964  | 0.062139164            | 0.005072096            | 0.033508158           | -0.02355891           | 0.07245129            | 0.15348062            |
| 1    | 158900385        | cg11177526 | PYHIN1         | Yes         | 0.736840866                     | 0.106682362 | 0.461697381  | 1.056878951 | 0.892113094            | -0.064211322           | 0.642411322           | -0.056902019          | 0.752717095           | 0.053569554           |
| 1    | 228503802        | cg18857768 | OBSCN          | Yes         | 0.984304369                     | 0.003803447 | 0.972930029  | 0.99575071  | 0.986857643            | 0.043739128            | 0.981283393           | 0.038164877           | 0.985770101           | 0.042651586           |
| 1    | 240656343        | cg10809217 | MIR1273E       | Yes         | 0.431955125                     |             |              |             |                        |                        |                       |                       |                       |                       |

|   |           |             |                    |     |             |             |              |              |             |              |             |              |              |              |
|---|-----------|-------------|--------------------|-----|-------------|-------------|--------------|--------------|-------------|--------------|-------------|--------------|--------------|--------------|
| 6 | 3849236   | cg18656763  | FAM50B:TSS-DMR     | Yes | 0.53784909  | 0.022575283 | 0.47012324   | 0.605574941  | 0.535398555 | 0.020217365  | 0.559323398 | 0.044142209  | 0.515188658  | 7.46787E-06  |
| 6 | 3849278   | cg09821214  | FAM50B:TSS-DMR     | Yes | 0.585452991 | 0.043584953 | 0.454698131  | 0.716207851  | 0.572462283 | 0.014134775  | 0.605766117 | 0.044383608  | 0.5275901329 | 0.01573821   |
| 6 | 3849295   | cg07898446  | FAM50B:TSS-DMR     | Yes | 0.508134453 | 0.026884946 | 0.427479615  | 0.68878929   | 0.49522841  | 0.008976506  | 0.602712513 | 0.02060248   | 0.524715507  | 0.03846602   |
| 6 | 3849328   | cg25195497  | FAM50B:TSS-DMR     | Yes | 0.621520819 | 0.064401112 | 0.428317482  | 0.814724156  | 0.538169286 | -0.052740384 | 0.595665562 | 0.004755892  | 0.712404571  | 0.123294901  |
| 6 | 3849332   | cg21740964  | FAM50B:TSS-DMR     | Yes | 0.705492715 | 0.062572963 | 0.17773828   | 0.893211603  | 0.617564543 | -0.055945901 | 0.675046933 | 0.002725569  | 0.78695019   | 0.117373654  |
| 6 | 3849351   | cg13289019  | FAM50B:TSS-DMR     | Yes | 0.409026031 | 0.02856111  | 0.2332427    | 0.494709362  | 0.394290662 | 0.001995934  | 0.434302706 | 0.42007978   | 0.383343894  | 0.010950834  |
| 6 | 3849382   | cg12840312  | FAM50B:TSS-DMR     | Yes | 0.60359418  | 0.027210043 | 0.52196405   | 0.685224309  | 0.67372565  | 0.031048737  | 0.58920414  | 0.012880312  | 0.614157443  | 0.03783614   |
| 6 | 3849392   | cg01905633  | FAM50B:TSS-DMR     | Yes | 0.429264365 | 0.03226399  | 0.33427395   | 0.526056336  | 0.396443347 | -0.01615129  | 0.428944691 | 0.018150054  | 0.437438399  | 0.02663762   |
| 6 | 3849412   | cg21117626  | FAM50B:TSS-DMR     | Yes | 0.450262272 | 0.035323503 | 0.34291764   | 0.56232781   | 0.441902416 | 0.052237573  | 0.526720616 | 0.027891773  | 0.438958551  | 0.029329708  |
| 6 | 3849435   | cg03954573  | FAM50B:TSS-DMR     | Yes | 0.652007368 | 0.034198807 | 0.549419047  | 0.754603789  | 0.617508766 | -0.006051066 | 0.74363012  | 0.05800288   | 0.652152297  | 0.028592465  |
| 6 | 3849459   | cg18197332  | FAM50B:TSS-DMR     | Yes | 0.641425552 | 0.03267069  | 0.545344344  | 0.7330676    | 0.616541747 | 0.001909741  | 0.659988566 | 0.04535656   | 0.63551475   | 0.02808217   |
| 6 | 3849476   | cg04446723  | FAM50B:TSS-DMR     | Yes | 0.657520229 | 0.027456727 | 0.575150048  | 0.73989041   | 0.654744822 | 0.027526083  | 0.658940452 | 0.031721713  | 0.659798368  | 0.032579629  |
| 6 | 3849537   | cg23835083  | FAM50B:TSS-DMR     | Yes | 0.615446925 | 0.03794205  | 0.501620776  | 0.792737073  | 0.596924184 | 0.010223051  | 0.60932564  | 0.022642507  | 0.624449102  | 0.060747969  |
| 6 | 3849543   | cg18487516  | FAM50B:TSS-DMR     | Yes | 0.691977022 | 0.038117802 | 0.577623616  | 0.806330427  | 0.644771899 | -0.015637585 | 0.714735267 | 0.054325782  | 0.727073217  | 0.061663732  |
| 6 | 3849578   | cg12497786  | FAM50B:TSS-DMR     | Yes | 0.725901074 | 0.038551276 | 0.610242747  | 0.841554901  | 0.732318158 | 0.036641704  | 0.783457969 | 0.087781514  | 0.675910516  | 0.019765938  |
| 6 | 3849689   | cg03202897  | FAM50B:TSS-DMR     | Yes | 0.780217421 | 0.028970618 | 0.693305567  | 0.867129276  | 0.76162954  | 0.015345945  | 0.803318868 | 0.057035273  | 0.766694815  | 0.02041122   |
| 6 | 3849691   | cg21153160  | FAM50B:TSS-DMR     | Yes | 0.491336025 | 0.031622914 | 0.596467284  | 0.586204766  | 0.506873438 | 0.036739462  | 0.480099044 | 0.009965068  | 0.470918358  | 0.000784382  |
| 6 | 3849703   | cg25073793  | FAM50B:TSS-DMR     | Yes | 0.708470419 | 0.027421827 | 0.596204937  | 0.820735901  | 0.685889976 | 0.009700882  | 0.70851366  | 0.032324567  | 0.70917653   | 0.0329785    |
| 6 | 3849819   | cg13101072  | FAM50B:TSS-DMR     | Yes | 0.665586398 | 0.037788975 | 0.552219474  | 0.778953322  | 0.62324843  | -0.013326744 | 0.674358779 | 0.037783605  | 0.692668599  | 0.056093425  |
| 6 | 3850107   | cg181561173 | FAM50B:TSS-DMR     | Yes | 0.612261177 | 0.0461867   | 0.538405168  | 0.686117186  | 0.623023121 | 0.015854433  | 0.63601541  | 0.049546722  | 0.586598413  | 0.000129725  |
| 6 | 144328422 | cg09730369  | PLAGL1_alt:TSS-DMR | Yes | 0.824999225 | 0.028422511 | 0.739731693  | 0.910266756  | 0.821922667 | 0.033419714  | 0.88191313  | 0.093410177  | 0.790067682  | 0.001565029  |
| 6 | 144328483 | cg17865602  | PLAGL1_alt:TSS-DMR | Yes | 0.652256521 | 0.042102638 | 0.525948606  | 0.778564436  | 0.615158908 | 0.029888415  | 0.667576141 | 0.046305648  | 0.647656569  | 0.023495077  |
| 6 | 144328918 | cg25350411  | PLAGL1_alt:TSS-DMR | Yes | 0.575090912 | 0.050564191 | 0.423398339  | 0.726783484  | 0.517332597 | -0.030851857 | 0.640508126 | 0.092323671  | 0.578176741  | 0.029929826  |
| 6 | 144329053 | cg07707459  | PLAGL1_alt:TSS-DMR | Yes | 0.591378256 | 0.033723292 | 0.490208378  | 0.692548133  | 0.608900055 | 0.043996375  | 0.588290033 | 0.023386353  | 0.585177384  | 0.020273704  |
| 6 | 144329173 | cg22378065  | PLAGL1_alt:TSS-DMR | Yes | 0.590858115 | 0.023526877 | 0.521100055  | 0.660616176  | 0.576435772 | 0.010777945  | 0.579132393 | 0.013474565  | 0.623561102  | 0.057903274  |
| 6 | 144329383 | cg22352234  | PLAGL1_alt:TSS-DMR | Yes | 0.527594293 | 0.026210135 | 0.448963888  | 0.66224698   | 0.518623503 | 0.014975395  | 0.518626333 | 0.014878224  | 0.534660145  | 0.030912036  |
| 6 | 144329474 | cg00702231  | PLAGL1_alt:TSS-DMR | Yes | 0.748503163 | 0.021690588 | 0.683431398  | 0.813574927  | 0.572962389 | 0.037459796  | 0.757449182 | 0.041945689  | 0.735358237  | 0.019854745  |
| 6 | 144329486 | cg12757684  | PLAGL1_alt:TSS-DMR | Yes | 0.427599825 | 0.028520994 | 0.428250862  | 0.513162808  | 0.448212481 | 0.037565814  | 0.44523063  | 0.031276396  | 0.403435661  | 0.007193106  |
| 6 | 144329745 | cg12820609  | PLAGL1_alt:TSS-DMR | NA  | 0.575947784 | 0.055283841 | 0.41009626   | 0.741799308  | 0.555769382 | 0.00602553   | 0.546662303 | 0.031004526  | 0.566641769  | 0.01687494   |
| 6 | 144329767 | cg05326984  | PLAGL1_alt:TSS-DMR | Yes | 0.652417564 | 0.022423826 | 0.585146086  | 0.719689041  | 0.654161961 | 0.01958266   | 0.657671168 | 0.020918607  | 0.660335366  | 0.016756065  |
| 6 | 144329781 | cg08263357  | PLAGL1_alt:TSS-DMR | Yes | 0.674667016 | 0.05001545  | 0.524620668  | 0.824713365  | 0.672513926 | 0.029384771  | 0.687367518 | 0.044238362  | 0.651750485  | 0.008621329  |
| 6 | 144329790 | cg11532302  | PLAGL1_alt:TSS-DMR | Yes | 0.530085394 | 0.04149318  | 0.405605853  | 0.456456934  | 0.542912859 | 0.019702668  | 0.546239586 | 0.040399395  | 0.495107575  | 0.010732617  |
| 6 | 144329803 | cg27216384  | PLAGL1_alt:TSS-DMR | Yes | 0.396527415 | 0.034573417 | 0.292807165  | 0.500247666  | 0.377155604 | -0.003529822 | 0.439513726 | 0.058832141  | 0.343129831  | -0.037551755 |
| 6 | 144329830 | cg17895149  | PLAGL1_alt:TSS-DMR | Yes | 0.701449774 | 0.0582225   | 0.533982123  | 0.868917425  | 0.716831803 | 0.048564277  | 0.729329341 | 0.079855442  | 0.611587196  | 0.011587196  |
| 6 | 144329888 | cg23460430  | PLAGL1_alt:TSS-DMR | Yes | 0.677569268 | 0.08902987  | 0.408160307  | 0.94697823   | 0.575571696 | -0.069736913 | 0.582229507 | -0.063283603 | 0.67959317   | 0.122446208  |
| 6 | 160427348 | cg16038989  | IGF2R:Intr2-DMR    | NA  | 0.641086255 | 0.048755204 | 0.49482604   | 0.787351868  | 0.615839978 | 0.004183769  | 0.682367126 | 0.070711154  | 0.638835659  | 0.021719451  |
| 6 | 160427502 | cg08350488  | IGF2R:Intr2-DMR    | Yes | 0.617156674 | 0.01280215  | 0.313316029  | 0.920997319  | 0.643118502 | 0.05775414   | 0.591274246 | 0.003929338  | 0.69612311   | 0.108780023  |
| 6 | 168785356 | cg25394782  | SMOCC              | Yes | 0.909065662 | 0.028548178 | 0.823420828  | 0.994710497  | 0.911321175 | 0.040250834  | 0.937845748 | 0.066775407  | 0.844410244  | 0.026660997  |
| 6 | 168785397 | cg12758485  | SMOCC              | Yes | 0.761577818 | 0.06475181  | 0.567324276  | 0.95583136   | 0.743471898 | 0.014693732  | 0.692538574 | 0.098580508  | 0.524921029  | -0.033571738 |
| 6 | 168785525 | cg01601658  | SMOCC              | Yes | 0.271372517 | 0.047727998 | 0.128190023  | 0.414555012  | 0.258803742 | -0.004417311 | 0.296783956 | 0.036265253  | 0.21539146   | -0.044881897 |
| 6 | 170055132 | cg11938672  | WDR27:Intr3-DMR    | NA  | 0.762200171 | 0.11765636  | 0.458703262  | 0.16659078   | 0.68872487  | 0.054840402  | 0.782292228 | 0.056020143  | 0.753461437  | 0.041429352  |
| 6 | 170055333 | cg18322025  | WDR27:Intr3-DMR    | Yes | 0.584065227 | 0.151137795 | 0.130651841  | 0.1037478613 | 0.574394432 | 0.010757099  | 0.561504618 | 0.0102132715 | 0.616220893  | 0.05258356   |
| 6 | 1980480   | cg12795815  | MAD1L1             | Yes | 0.217015951 | 0.098741975 | -0.079209957 | 0.193241877  | 0.191987632 | -0.003427106 | 0.191988856 | -0.120620418 | 0.096289949  | -1.027015127 |
| 6 | 1980809   | cg26996890  | MAD1L1             | Yes | 0.98323655  | 0.010483516 | 0.90706004   | 1.015767097  | 0.9884570   | 0.046528161  | 0.990309133 | 0.048380275  | 0.96201196   | 0.018283102  |
| 6 | 23530000  | cg12829142  | RP52P32            | Yes | 0.330960321 | 0.060786735 | 0.145600115  | 0.513320527  | 0.260500747 | -0.058891735 | 0.811315435 | 0.01722952   | 0.962277946  | -0.035114537 |
| 6 | 23530811  | cg16204552  | RP52P32            | Yes | 0.772546246 | 0.076659484 | 0.542567794  | 1.002524698  | 0.7052871   | -0.032513226 | 0.85801177  | 0.120211395  | 0.810187317  | 0.073268942  |
| 6 | 50849169  | cg03104936  | GRB10:alt-TSS-DMR  | Yes | 0.684476213 | 0.064859169 | 0.586966756  | 0.829858669  | 0.653480866 | 0.000628174  | 0.717337245 | 0.048448553  | 0.92185343   | 0.03934312   |
| 6 | 50849286  | cg05998930  | GRB10:alt-TSS-DMR  | Yes | 0.805176378 | 0.054949936 | 0.64032657   | 0.970026165  | 0.772034797 | 0.004824218  | 0.753438684 | -0.014311896 | 0.658997436  | 0.029246856  |
| 6 | 50849724  | cg16349612  | GRB10:alt-TSS-DMR  | Yes | 0.706515316 | 0.040314427 | 0.58029844   | 0.702796808  | 0.673475839 | 0.028910852  | 0.69650798  | 0.022085811  | 0.69549415   | 0.020924158  |
| 6 | 50849806  | cg23742152  | GRB10:alt-TSS-DMR  | Yes | 0.563215813 | 0.03457339  | 0.450945643  | 0.666935983  | 0.529338867 | -0.008535225 | 0.680123942 | 0.04249851   | 0.585433919  | 0.047559828  |
| 6 | 50849932  | cg08883688  | GRB10:alt-TSS-DMR  | Yes | 0.619427123 | 0.039478933 | 0.450909324  | 0.673639322  | 0.627622532 | 0.035143007  | 0.51755849  | 0.025276323  | 0.606777473  | 0.011198217  |
| 6 | 50850565  | cg12903171  | GRB10:alt-TSS-DMR  | Yes | 0.597643454 | 0.04544756  | 0.461309185  | 0.733977723  | 0.621170548 | 0.051139728  | 0.552187312 | -0.018378449 | 0.596702316  | 0.026136676  |
| 6 | 50850636  | cg23023285  | GRB10:alt-TSS-DMR  | NA  | 0.623792364 | 0.03665832  | 0.514694868  | 0.73289896   | 0.629518085 | 0.032654191  | 0.618539434 | 0.0267582    | 0.6244333    | 0.02969536   |
| 6 | 50850756  | cg27563667  | GRB10:alt-TSS-DMR  | NA  | 0.33468053  | 0.03905351  | 0.21707523   | 0.451528584  | 0.331839459 | 0.009475698  | 0.318550294 | -0.003813468 | 0.333190886  | 0.10826824   |
| 6 | 50850871  | cg24977055  | GRB10:alt-TSS-DMR  | Yes | 0.63098496  | 0.041943849 | 0.505153412  | 0.756816509  | 0.624619604 | 0.02165047   | 0.642901421 | 0.039932288  | 0.635056087  | 0.032086953  |
| 6 | 5085643   | cg19107595  | PEG10:TSS-DMR      | Yes | 0.203674733 | 0.04295908  | 0.074797492  | 0.32551973   | 0.22865686  | 0.035319441  | 0.224360374 | 0.031022955  | 0.211654208  | 0.018316789  |
| 6 | 5085668   | cg19924104  | PEG10:TSS-DMR      | Yes | 0.394588889 | 0.033749679 | 0.293338015  | 0.495837926  | 0.360550365 | -0.016769908 | 0.426470136 | 0.049149863  | 0.407673925  | 0.030356252  |
| 6 | 5085686   | cg11589966  | PEG10:TSS-DMR      | Yes | 0.547417276 | 0.0307711   |              |              |             |              |             |              |              |              |

|   |           |             |                  |     |             |             |             |             |             |              |             |              |             |              |
|---|-----------|-------------|------------------|-----|-------------|-------------|-------------|-------------|-------------|--------------|-------------|--------------|-------------|--------------|
| 7 | 130130996 | cg00903373  | MEST:at-TSS-DMR  | Yes | 0.482392528 | 0.045521314 | 0.345828587 | 0.61895647  | 0.515141976 | 0.054553011  | 0.488394964 | 0.027805999  | 0.433583519 | -0.027005445 |
| 7 | 130131086 | cg14088957  | MEST:at-TSS-DMR  | Yes | 0.504663356 | 0.054102194 | 0.342356776 | 0.666069937 | 0.470481614 | -0.010655275 | 0.538110803 | 0.056973914  | 0.479866351 | -0.012705377 |
| 7 | 130131137 | cg061000421 | MEST:at-TSS-DMR  | Yes | 0.587355149 | 0.062229098 | 0.400667855 | 0.774042443 | 0.527930432 | -0.031758176 | 0.588784861 | 0.029060294  | 0.619168312 | -0.059479704 |
| 7 | 130131139 | cg02097423  | MEST:at-TSS-DMR  | Yes | 0.533387866 | 0.062371413 | 0.346273567 | 0.720502045 | 0.462737094 | -0.04351693  | 0.581599494 | 0.07534547   | 0.548680998 | 0.024462974  |
| 7 | 130131147 | cg053696971 | MEST:at-TSS-DMR  | Yes | 0.449586511 | 0.034164921 | 0.340719549 | 0.522081273 | 0.418975504 | -0.014323253 | 0.410715718 | -0.022582139 | 0.461391892 | 0.02804035   |
| 7 | 130131190 | cg08734637  | MEST:at-TSS-DMR  | Yes | 0.515796888 | 0.029942084 | 0.425976037 | 0.605623138 | 0.520052477 | 0.026132021  | 0.487088273 | -0.006832182 | 0.515117782 | 0.021197327  |
| 7 | 130131259 | cg139115750 | MEST:at-TSS-DMR  | Yes | 0.629718376 | 0.049378189 | 0.481583809 | 0.77852942  | 0.591498923 | -0.008685629 | 0.605927248 | 0.002787371  | 0.651518256 | -0.051336499 |
| 7 | 130131269 | cg254071198 | MEST:at-TSS-DMR  | NA  | 0.640321704 | 0.059529457 | 0.461733333 | 0.81910075  | 0.6128314   | 0.002621789  | 0.647424541 | 0.037214929  | 0.660828655 | -0.050619404 |
| 7 | 130131360 | cg21667116  | MEST:at-TSS-DMR  | Yes | 0.598120371 | 0.064765728 | 0.403790638 | 0.792501503 | 0.553885575 | -0.014866973 | 0.653369619 | 0.086617071  | 0.555252473 | -0.013500076 |
| 7 | 130131368 | cg23156962  | MEST:at-TSS-DMR  | Yes | 0.485909691 | 0.050007727 | 0.335073761 | 0.635120121 | 0.438756588 | -0.029207082 | 0.469533863 | 0.00780193   | 0.498404096 | 0.036740426  |
| 7 | 130131404 | cg04678950  | MEST:at-TSS-DMR  | Yes | 0.640733144 | 0.057686027 | 0.467675062 | 0.813791227 | 0.603597908 | -0.011695607 | 0.685738517 | 0.007983202  | 0.644763755 | -0.030008441 |
| 7 | 130131481 | cg17093235  | MEST:at-TSS-DMR  | Yes | 0.678424641 | 0.052604198 | 0.520612046 | 0.836237236 | 0.647041904 | -0.00112922  | 0.679747828 | -0.031576704 | 0.693333281 | 0.045162156  |
| 7 | 130131485 | cg04344875  | MEST:at-TSS-DMR  | Yes | 0.680245569 | 0.056322479 | 0.511278132 | 0.849213007 | 0.680397499 | 0.032888022  | 0.643769628 | -0.00373985  | 0.694818616 | 0.047309139  |
| 7 | 130131634 | cg00286878  | MEST:at-TSS-DMR  | Yes | 0.703728777 | 0.052532618 | 0.546130922 | 0.861326631 | 0.643851614 | -0.027898067 | 0.723193111 | 0.05144343   | 0.697210747 | -0.025461067 |
| 7 | 130131677 | cg12347392  | MEST:at-TSS-DMR  | Yes | 0.620856944 | 0.057359784 | 0.448777593 | 0.792936294 | 0.565220762 | -0.029275978 | 0.628329869 | 0.033833129  | 0.654804073 | -0.060343933 |
| 7 | 130131692 | cg04786207  | MEST:at-TSS-DMR  | Yes | 0.667798576 | 0.05512877  | 0.502412267 | 0.833184886 | 0.621247559 | -0.015982645 | 0.694869625 | 0.057639421  | 0.686976146 | 0.049745941  |
| 7 | 130131731 | cg26708559  | MEST:at-TSS-DMR  | Yes | 0.627338885 | 0.048668233 | 0.481334186 | 0.773343584 | 0.629658021 | 0.032338023  | 0.574661462 | -0.022651336 | 0.650662926 | -0.058750128 |
| 7 | 130131798 | cg27025386  | MEST:at-TSS-DMR  | Yes | 0.703614404 | 0.051594836 | 0.575576896 | 0.885145912 | 0.698329254 | -0.011850375 | 0.786102829 | 0.084923199  | 0.719748963 | 0.018569334  |
| 7 | 130131827 | cg06212135  | MEST:at-TSS-DMR  | Yes | 0.743822816 | 0.042710292 | 0.615691939 | 0.871953693 | 0.746576887 | 0.036919454  | 0.752080613 | 0.042424379  | 0.755682089 | 0.046205875  |
| 7 | 130131830 | cg10249538  | MEST:at-TSS-DMR  | Yes | 0.725733303 | 0.035880582 | 0.618091556 | 0.83337505  | 0.720308445 | 0.02628242   | 0.740036933 | 0.045656907  | 0.717950989 | 0.024470884  |
| 7 | 130131870 | cg16823958  | MEST:at-TSS-DMR  | Yes | 0.721226978 | 0.026799401 | 0.640828774 | 0.801625182 | 0.722594667 | 0.031413146  | 0.708839443 | 0.017657921  | 0.716661701 | 0.02548018   |
| 7 | 130131886 | cg27338480  | MEST:at-TSS-DMR  | Yes | 0.674238326 | 0.03206091  | 0.562636468 | 0.782480184 | 0.644406748 | 0.054606748  | 0.654469093 | 0.010915705  | 0.697086824 | -0.053434346 |
| 7 | 130131888 | cg09809131  | MEST:at-TSS-DMR  | Yes | 0.664927955 | 0.030771455 | 0.572613591 | 0.75724232  | 0.675493766 | 0.038653249  | 0.685628819 | 0.048788301  | 0.636325783 | -0.000514734 |
| 7 | 130131906 | cg13104298  | MEST:at-TSS-DMR  | Yes | 0.744763658 | 0.034208463 | 0.642138269 | 0.847389047 | 0.676484467 | 0.045663013  | 0.733785627 | 0.022800173  | 0.724433605 | 0.013448151  |
| 7 | 130131924 | cg20050761  | MEST:at-TSS-DMR  | Yes | 0.534948293 | 0.029874757 | 0.445324021 | 0.624572566 | 0.522812906 | 0.011975782  | 0.512521697 | 0.001684573  | 0.538414291 | 0.027571767  |
| 7 | 130132162 | cg05556276  | MEST:at-TSS-DMR  | Yes | 0.589823468 | 0.030485033 | 0.498368337 | 0.681278567 | 0.601471833 | 0.036864039  | 0.559851533 | -0.004756261 | 0.601762306 | 0.041168293  |
| 7 | 130132200 | cg17580798  | MEST:at-TSS-DMR  | Yes | 0.599897617 | 0.029065549 | 0.521700972 | 0.687094263 | 0.591537605 | 0.017761166  | 0.613425852 | 0.039835414  | 0.594428062 | 0.020837623  |
| 7 | 130132260 | cg05862114  | MEST:at-TSS-DMR  | Yes | 0.296096805 | 0.062081076 | 0.109853576 | 0.482340034 | 0.225703629 | -0.05843674  | 0.34206671  | 0.057926341  | 0.299409443 | 0.006354061  |
| 7 | 130132266 | cg01784351  | MEST:at-TSS-DMR  | Yes | 0.496859031 | 0.062562176 | 0.309157382 | 0.685066079 | 0.493393659 | 0.020019066  | 0.513407774 | 0.040033182  | 0.49576875  | -0.013605842 |
| 7 | 130132287 | cg27589003  | MEST:at-TSS-DMR  | Yes | 0.487994421 | 0.043299502 | 0.358095916 | 0.617849257 | 0.504770181 | 0.03872033   | 0.520826933 | 0.0408313082 | 0.450030666 | -0.016019185 |
| 7 | 130132306 | cg23714917  | MEST:at-TSS-DMR  | Yes | 0.709497711 | 0.036115503 | 0.60151202  | 0.817844219 | 0.699092089 | 0.019629235  | 0.708909438 | 0.029465824  | 0.705464678 | 0.026001823  |
| 7 | 130132361 | cg25519926  | MEST:at-TSS-DMR  | Yes | 0.703900303 | 0.025643798 | 0.62696891  | 0.780831696 | 0.702777764 | 0.029802789  | 0.699027313 | 0.02052338   | 0.71613681  | 0.043161834  |
| 7 | 130132420 | cg22592140  | MEST:at-TSS-DMR  | Yes | 0.619196405 | 0.054091229 | 0.456922718 | 0.781470092 | 0.559656154 | -0.030837616 | 0.660489415 | 0.069956646  | 0.684290054 | -0.093796284 |
| 7 | 130132423 | cg05588221  | MEST:at-TSS-DMR  | Yes | 0.658650186 | 0.047971025 | 0.514737111 | 0.80256326  | 0.650721454 | 0.022801584  | 0.657030729 | 0.029108158  | 0.652330939 | 0.024408369  |
| 7 | 130132454 | cg13986840  | MEST:at-TSS-DMR  | Yes | 0.628341718 | 0.07168228  | 0.398387034 | 0.862846402 | 0.603336069 | 0.031547792  | 0.661795716 | 0.063009899  | 0.625169711 | 0.026383894  |
| 7 | 130133111 | cg052660959 | MEST:at-TSS-DMR  | Yes | 0.822786403 | 0.0321256   | 0.693148722 | 0.952424083 | 0.813271155 | 0.04531193   | 0.824273447 | 0.0383313222 | 0.819090763 | 0.033130539  |
| 7 | 130134257 | cg18622506  | MEST:at-TSS-DMR  | NA  | 0.381355417 | 0.040488111 | 0.067894804 | 0.694820649 | 0.37783401  | 0.004979066  | 0.484870949 | 0.112016005  | 0.226563662 | -0.146291282 |
| 7 | 138348775 | cg05719902  | MEST:at-TSS-DMR  | Yes | 0.510870941 | 0.077458459 | 0.278495562 | 0.743246139 | 0.439734585 | -0.048183904 | 0.589033752 | 0.011152623  | 0.432159966 | -0.055758824 |
| 7 | 138348982 | cg16111924  | SVOP:Lat-TSS-DMR | Yes | 0.10751919  | 0.044087397 | 0.018491    | 0.28201538  | 0.129542576 | -0.020920574 | 0.173898254 | 0.027630203  | 0.148287037 | -0.024603799 |
| 7 | 154862771 | cg25780543  | HTRSA:TS-DMR     | Yes | 0.327562263 | 0.048861616 | 0.180969765 | 0.474154761 | 0.273505592 | -0.034878588 | 0.368866007 | 0.060481827  | 0.300887809 | -0.007496371 |
| 7 | 154862970 | cg25805298  | HTRSA:TS-DMR     | Yes | 0.617349042 | 0.031485363 | 0.522892953 | 0.711805131 | 0.623623212 | -0.018053944 | 0.60326476  | -0.012578604 | 0.665310495 | -0.047462439 |
| 7 | 154863008 | cg09125907  | HTRSA:TS-DMR     | NA  | 0.670417758 | 0.043256604 | 0.540647906 | 0.800187571 | 0.629687013 | -0.010074442 | 0.63263936  | -0.001722095 | 0.718518003 | -0.078756548 |
| 7 | 154863177 | cg25058023  | HTRSA:TS-DMR     | Yes | 0.600592813 | 0.046341996 | 0.461566826 | 0.7396188   | 0.547107773 | -0.028564556 | 0.648275513 | 0.072603184  | 0.618450203 | 0.048226293  |
| 7 | 154863245 | cg03024742  | HTRSA:TS-DMR     | Yes | 0.691826712 | 0.04108962  | 0.5685575   | 0.815095573 | 0.64674157  | -0.014863303 | 0.709056973 | 0.0474521    | 0.678380963 | 0.01767609   |
| 7 | 154863324 | cg13892088  | HTRSA:TS-DMR     | NA  | 0.751467018 | 0.053283702 | 0.591615913 | 0.911318123 | 0.714597991 | -0.001361547 | 0.757597438 | 0.0470159    | 0.755899188 | 0.0399365    |
| 7 | 154863339 | cg10538202  | HTRSA:TS-DMR     | Yes | 0.791470693 | 0.047190699 | 0.649898595 | 0.93304279  | 0.706183227 | -0.050767817 | 0.81816185  | 0.061201746  | 0.847608531 | 0.090657426  |
| 7 | 154863382 | cg09623773  | HTRSA:TS-DMR     | Yes | 0.837878789 | 0.039839078 | 0.718631554 | 0.957396204 | 0.844222288 | 0.044649546  | 0.848757335 | 0.003206252  | 0.880258184 | 0.08065502   |
| 8 | 2585667   | cg24475182  | LOC101927815_1   | Yes | 0.280647499 | 0.083411793 | 0.03041212  | 0.530882879 | 0.2313669   | -0.034609007 | 0.25926117  | -0.006713791 | 0.338491893 | 0.072515985  |
| 8 | 2586226   | cg1171988   | LOC101927815_2   | Yes | 0.321377999 | 0.038372542 | 0.071260373 | 0.511496525 | 0.296390831 | -0.005624769 | 0.335685433 | 0.03669832   | 0.311021936 | 0.029060636  |
| 8 | 2591208   | cg04671734  | LOC101927815_2   | Yes | 0.404824842 | 0.090542527 | 0.13319726  | 0.67452424  | 0.33398206  | -0.051711742 | 0.461600318 | 0.078306516  | 0.415667787 | 0.034267985  |
| 8 | 2591412   | cg08242633  | LOC101927815_2   | Yes | 0.474296871 | 0.115542967 | 0.00807574  | 0.94658168  | 0.397984919 | -0.106100118 | 0.608453608 | 0.162455071  | 0.642548269 | 0.018530158  |
| 8 | 37605553  | cg05020125  | ERLNI2:Inf6-DMR  | Yes | 0.40920349  | 0.06589342  | 0.211252329 | 0.606883751 | 0.390436759 | 0.004882457  | 0.461428255 | 0.075888552  | 0.398835226 | 0.013329223  |
| 8 | 37605718  | cg21505509  | ERLNI2:Inf6-DMR  | Yes | 0.581216556 | 0.064647413 | 0.382747318 | 0.715158793 | 0.59449528  | 0.038201414  | 0.626222776 | 0.073974662  | 0.53171272  | -0.020535395 |
| 8 | 37605784  | cg08247852  | ERLNI2:Inf6-DMR  | Yes | 0.605367444 | 0.08743044  | 0.334051263 | 0.866773626 | 0.529338759 | -0.047377044 | 0.721949881 | 0.145234078  | 0.563542836 | 0.013172967  |
| 8 | 37605979  | cg00450319  | ERLNI2:Inf6-DMR  | Yes | 0.653967772 | 0.068290942 | 0.449094946 | 0.858480598 | 0.678573799 | 0.05367682   | 0.722579323 | 0.595353206  | 0.599334435 | -0.02591682  |
| 8 | 61626647  | cg12844324  | CHD7             | Yes | 0.601211867 | 0.054487508 | 0.437749345 | 0.74667439  | 0.54597863  | -0.028107719 | 0.63778278  | 0.063696431  | 0.658137651 | 0.084051302  |
| 8 | 61626833  | cg20648501  | CHD7             | Yes | 0.770214923 | 0.033141015 | 0.670791878 | 0.869637969 | 0.740938003 | 0.003989858  | 0.798974939 | 0.062035814  | 0.825496577 | 0.084610532  |



|    |           |            |                  |     |             |             |              |             |             |              |             |              |             |              |
|----|-----------|------------|------------------|-----|-------------|-------------|--------------|-------------|-------------|--------------|-------------|--------------|-------------|--------------|
| 11 | 2154639   | cg26401390 | IGF2:Ex9-DMR     | Yes | 0.624133737 | 0.047608883 | 0.481307089  | 0.766960384 | 0.49795635  | -0.098691699 | 0.615839849 | 0.0191918    | 0.645203796 | 0.048555747  |
| 11 | 2154935   | cg05384664 | IGF2:Ex9-DMR     | Yes | 0.799534796 | 0.038518402 | 0.68397959   | 0.915900003 | 0.700636237 | -0.063194859 | 0.793256206 | 0.02942511   | 0.812734621 | 0.048903526  |
| 11 | 2154935   | cg00570578 | IGF2:Ex9-DMR     | Yes | 0.803937017 | 0.038896351 | 0.682947964  | 0.920626071 | 0.703227822 | -0.064451746 | 0.797461879 | 0.02942511   | 0.812637772 | 0.058504205  |
| 11 | 2168626   | cg19642877 | IGF2:alt-TSS-DMR | Yes | 0.626156499 | 0.038474206 | 0.510733881  | 0.741579118 | 0.489494959 | -0.125084493 | 0.612711763 | 0.01272321   | 0.687649434 | 0.038714682  |
| 11 | 2169139   | cg20622142 | IGF2:alt-TSS-DMR | NA  | 0.34911607  | 0.047312163 | 0.20717958   | 0.407525599 | 0.204690504 | -0.093239338 | 0.361224407 | 0.027293016  | 0.673729994 | 0.09741603   |
| 11 | 2720230   | cg27119222 | KCNQ1OT1:TSS-DMR | Yes | 0.695874466 | 0.058219796 | 0.521215099  | 0.805533874 | 0.666578781 | 0.001125468  | 0.70752442  | 0.042071107  | 0.709438057 | 0.03497645   |
| 11 | 2720464   | cg00000924 | KCNQ1OT1:TSS-DMR | Yes | 0.626726151 | 0.058899633 | 0.450037161  | 0.803415141 | 0.641619963 | 0.018447833  | 0.622871141 | 0.026415012  | 0.628618726 | 0.04664597   |
| 11 | 2720811   | cg11297256 | KCNQ1OT1:TSS-DMR | Yes | 0.288397648 | 0.031734786 | 0.193193289  | 0.383602008 | 0.268877311 | -0.009412668 | 0.588270625 | 0.010430646  | 0.29204008  | 0.013750101  |
| 11 | 2721244   | cg12077660 | KCNQ1OT1:TSS-DMR | Yes | 0.560319753 | 0.024729986 | 0.479779935  | 0.613159711 | 0.60831266  | 0.022791459  | 0.59989015  | 0.025176814  | 0.537593295 | 0.720938106  |
| 11 | 2721249   | cg03401726 | KCNQ1OT1:TSS-DMR | Yes | 0.616704419 | 0.031772528 | 0.521368835  | 0.712022002 | 0.59330654  | 0.006462815  | 0.605396503 | 0.016552778  | 0.643646801 | 0.055521076  |
| 11 | 2721337   | cg16739686 | KCNQ1OT1:TSS-DMR | Yes | 0.59072947  | 0.036684473 | 0.480676001  | 0.700518287 | 0.560543193 | -0.003383786 | 0.629522618 | 0.069339598  | 0.566033958 | 0.005106979  |
| 11 | 2721352   | cg08359167 | KCNQ1OT1:TSS-DMR | Yes | 0.561870618 | 0.03363691  | 0.460959889  | 0.662781348 | 0.547597293 | 0.009824566  | 0.564125103 | 0.026323276  | 0.555571105 | 0.017798322  |
| 11 | 2721367   | cg08446215 | KCNQ1OT1:TSS-DMR | Yes | 0.723766907 | 0.031698784 | 0.628670555  | 0.818863258 | 0.676010916 | -0.016992161 | 0.751393553 | 0.058390475  | 0.735458323 | 0.042455246  |
| 11 | 2721384   | cg26104781 | KCNQ1OT1:TSS-DMR | Yes | 0.738156416 | 0.036683645 | 0.628105482  | 0.84820735  | 0.744805992 | 0.042116878  | 0.750348996 | 0.044405881  | 0.720420703 | 0.014477588  |
| 11 | 2721410   | cg02219360 | KCNQ1OT1:TSS-DMR | Yes | 0.572634917 | 0.031001662 | 0.479629931  | 0.665639903 | 0.544162207 | -0.006500051 | 0.582510849 | 0.031848591  | 0.599843197 | 0.009180939  |
| 11 | 2721481   | cg07592503 | KCNQ1OT1:TSS-DMR | Yes | 0.549505965 | 0.033290668 | 0.449633959  | 0.64937797  | 0.535480879 | 0.010156592  | 0.573501137 | 0.048176851  | 0.525450215 | 0.040125928  |
| 11 | 2721592   | cg09518720 | KCNQ1OT1:TSS-DMR | Yes | 0.683415336 | 0.040056664 | 0.563245448  | 0.805358328 | 0.657659801 | 0.003102376  | 0.707898241 | 0.053340816  | 0.672132478 | 0.017575054  |
| 11 | 2721611   | cg14954841 | KCNQ1OT1:TSS-DMR | Yes | 0.622536386 | 0.048757316 | 0.476264635  | 0.768808334 | 0.594273029 | 0.009092134  | 0.594272704 | 0.00108892   | 0.646912845 | 0.05327469   |
| 11 | 2721620   | cg27323091 | KCNQ1OT1:TSS-DMR | Yes | 0.590208554 | 0.029587709 | 0.501452126  | 0.678968592 | 0.586432307 | 0.021153326  | 0.585185055 | 0.019906704  | 0.624536173 | 0.059257192  |
| 11 | 2721633   | cg01873334 | KCNQ1OT1:TSS-DMR | Yes | 0.790802681 | 0.03202609  | 0.694724411  | 0.886880952 | 0.786736587 | 0.029394918  | 0.807638294 | 0.039262625  | 0.826754024 | 0.047412355  |
| 11 | 2721800   | cg05816130 | KCNQ1OT1:TSS-DMR | Yes | 0.672161266 | 0.047350864 | 0.530108674  | 0.814213809 | 0.683255411 | 0.042014833  | 0.630493648 | -0.010746929 | 0.672648435 | 0.031407858  |
| 11 | 2721818   | cg14243741 | KCNQ1OT1:TSS-DMR | Yes | 0.689502237 | 0.050599928 | 0.537702453  | 0.841302021 | 0.654216335 | -0.002447962 | 0.673946815 | 0.017282517  | 0.707278766 | 0.050614669  |
| 11 | 2721867   | cg05740879 | KCNQ1OT1:TSS-DMR | Yes | 0.758476649 | 0.038230329 | 0.643785661  | 0.873167636 | 0.745018407 | 0.020271697  | 0.744999894 | 0.020253185  | 0.776452987 | 0.051706277  |
| 11 | 2721953   | cg01893176 | KCNQ1OT1:TSS-DMR | Yes | 0.641189608 | 0.041111328 | 0.517855625  | 0.76452359  | 0.597906058 | -0.014843136 | 0.630723849 | 0.017974656  | 0.662971716 | 0.062921716  |
| 11 | 2722063   | cg11666921 | KCNQ1OT1:TSS-DMR | Yes | 0.482355025 | 0.066715405 | 0.282208008  | 0.682501241 | 0.491748361 | 0.029628983  | 0.479353027 | 0.017233649  | 0.485982383 | 0.023683005  |
| 11 | 2722074   | cg26094482 | KCNQ1OT1:TSS-DMR | Yes | 0.412978289 | 0.030533553 | 0.321378823  | 0.504578346 | 0.381419395 | -0.013366427 | 0.449830254 | 0.050540433  | 0.411671395 | 0.016855785  |
| 11 | 2722083   | cg03422070 | KCNQ1OT1:TSS-DMR | Yes | 0.727294196 | 0.044260834 | 0.594511696  | 0.860676697 | 0.707107406 | 0.013322814  | 0.719232027 | 0.025447435  | 0.743369779 | 0.049585187  |
| 11 | 2722085   | cg15651941 | KCNQ1OT1:TSS-DMR | Yes | 0.572427078 | 0.049100929 | 0.452124291  | 0.719729865 | 0.548647031 | 0.004755236  | 0.581661744 | 0.037769949  | 0.588145352 | 0.042553557  |
| 11 | 2722087   | cg25306939 | KCNQ1OT1:TSS-DMR | Yes | 0.641419296 | 0.058709275 | 0.462591472  | 0.817541121 | 0.635655229 | 0.024549497  | 0.630350026 | 0.019244295  | 0.64836328  | 0.032757488  |
| 11 | 2722196   | cg02798157 | KCNQ1OT1:TSS-DMR | Yes | 0.560176788 | 0.061312426 | 0.376239509  | 0.744114067 | 0.578423522 | 0.046161745  | 0.477324676 | -0.054919102 | 0.58260481  | 0.050343033  |
| 11 | 48892552  | cg17182551 | RB1:ln2-DMR      | Yes | 0.853631005 | 0.037333086 | 0.741631747  | 0.965630262 | 0.840576292 | 0.022591312  | 0.902789511 | 0.084084051  | 0.833406067 | 0.015421087  |
| 11 | 48893175  | cg13431205 | RB1:ln2-DMR      | Yes | 0.608992367 | 0.044145588 | 0.46755604   | 0.741429131 | 0.50797644  | -0.011662871 | 0.64819142  | 0.06179832   | 0.599804047 | 0.017201159  |
| 11 | 48893728  | cg18481241 | RB1:ln2-DMR      | Yes | 0.550594731 | 0.049919765 | 0.400834546  | 0.700354027 | 0.54854552  | 0.023590635  | 0.6068865   | 0.081937666  | 0.497824465 | -0.027130419 |
| 11 | 48894215  | cg25676335 | RB1:ln2-DMR      | Yes | 0.812176439 | 0.030105116 | 0.721244891  | 0.903107987 | 0.801224278 | 0.024389713  | 0.81750635  | 0.04671785   | 0.819615001 | 0.024780436  |
| 11 | 48894383  | cg00059930 | RB1:ln2-DMR      | Yes | 0.600681878 | 0.043981373 | 0.468737759  | 0.732625996 | 0.581799061 | 0.008498115  | 0.639077854 | 0.065776908  | 0.58287897  | 0.009487024  |
| 11 | 48895242  | cg26740195 | RB1:ln2-DMR      | Yes | 0.632471036 | 0.047378263 | 0.49036247   | 0.774605826 | 0.5922683   | -0.011650142 | 0.641201931 | 0.037283489  | 0.638354565 | 0.034361221  |
| 11 | 48895319  | cg27027613 | RB1:ln2-DMR      | Yes | 0.689014522 | 0.038116738 | 0.574636007  | 0.803364737 | 0.656633006 | 0.00481863   | 0.656651523 | -0.004859873 | 0.740745247 | 0.079233851  |
| 11 | 48895479  | cg07880751 | RB1:ln2-DMR      | Yes | 0.748542407 | 0.037870997 | 0.634929415  | 0.862155398 | 0.720618433 | 0.003764071  | 0.7784827   | 0.061574347  | 0.731972302 | -0.01511794  |
| 11 | 11062248  | cg18114040 | COL4A2           | Yes | 0.284940753 | 0.048297697 | 0.140047661  | 0.429838285 | 0.231616923 | 0.002934777  | 0.331670614 | 0.028947317  | 0.228830719 | 0.044922622  |
| 11 | 11062267  | cg08959039 | COL4A2           | Yes | 0.57236764  | 0.056967336 | 0.410465632  | 0.743266948 | 0.580390233 | 0.031001161  | 0.532710068 | -0.016679004 | 0.51577764  | 0.018388667  |
| 11 | 11062288  | cg11096515 | COL4A2           | Yes | 0.584306978 | 0.04747369  | 0.361482941  | 0.87131014  | 0.591713392 | 0.058689743  | 0.591713267 | 0.006809021  | 0.53683448  | -0.042472969 |
| 11 | 115000150 | cg10254888 | CDC16            | Yes | 0.105154491 | 0.039295552 | -0.012732164 | 0.223041145 | 0.066711959 | -0.03350561  | 0.137541887 | 0.037319318  | 0.100959222 | 0.000736653  |
| 11 | 115000163 | cg24890222 | CDC16            | Yes | 0.105150346 | 0.037879037 | -0.008486765 | 0.218784756 | 0.065831163 | -0.040268369 | 0.117859734 | 0.027602020  | 0.098042794 | 0.000943262  |
| 11 | 101192853 | cg14902276 | DLK1             | Yes | 0.558303518 | 0.049473282 | 0.409883672  | 0.706723363 | 0.456631063 | -0.079590217 | 0.632752088 | 0.096530808  | 0.529487285 | -0.006735995 |
| 11 | 101192861 | cg18373878 | DLK1             | Yes | 0.752427998 | 0.048104023 | 0.619717598  | 0.875680068 | 0.675986259 | -0.048468481 | 0.77231295  | 0.052777209  | 0.767010626 | -0.046153883 |
| 11 | 101192914 | cg10528576 | DLK1             | Yes | 0.47552124  | 0.077920055 | 0.24152235   | 0.709272564 | 0.42517545  | -0.037608607 | 0.524730629 | 0.061946572  | 0.471794367 | 0.009010311  |
| 11 | 101277287 | cg27281850 | MEG3:DLK1:IG-DMR | NA  | 0.791294669 | 0.046601408 | 0.645940945  | 0.790989894 | 0.68733938  | -0.127089546 | 0.822738578 | 0.06765634   | 0.802284183 | 0.04711238   |
| 11 | 101290557 | cg00764369 | MEG3:TSS-DMR     | Yes | 0.810857518 | 0.028694279 | 0.724774682  | 0.896940353 | 0.627558546 | -0.142967948 | 0.834938197 | 0.05211703   | 0.832578239 | 0.056851745  |
| 11 | 101290718 | cg10515315 | MEG3:TSS-DMR     | Yes | 0.552500248 | 0.060786867 | 0.371903966  | 0.73486085  | 0.192813367 | -0.331904042 | 0.5894691   | 0.0926571691 | 0.951952251 | 0.662724842  |
| 11 | 101290868 | cg15991555 | MEG3:TSS-DMR     | Yes | 0.649692062 | 0.056326184 | 0.480713511  | 0.818670613 | 0.208640931 | -0.14224408  | 0.68181404  | 0.060929068  | 0.689537454 | 0.068652442  |
| 11 | 101291069 | cg23870378 | MEG3:TSS-DMR     | Yes | 0.602207596 | 0.055399853 | 0.460030836  | 0.768407156 | 0.593887204 | -0.21484883  | 0.667368544 | 0.059256502  | 0.633791895 | 0.050198544  |
| 11 | 101291101 | cg14034270 | MEG3:TSS-DMR     | Yes | 0.872768976 | 0.026260372 | 0.79398786   | 0.951550091 | 0.782945027 | -0.052253841 | 0.894684495 | 0.059485628  | 0.900703675 | 0.065504807  |
| 11 | 101291137 | cg16567044 | MEG3:TSS-DMR     | Yes | 0.56109419  | 0.053411908 | 0.400858466  | 0.713239913 | 0.499179497 | -0.05701612  | 0.542923438 | 0.014884726  | 0.6196205   | 0.685270842  |
| 11 | 101291181 | cg10540302 | MEG3:TSS-DMR     | Yes | 0.676985657 | 0.044623079 | 0.543089419  | 0.810881895 | 0.541495894 | -0.104418918 | 0.666979925 | 0.023765113  | 0.709013086 | 0.063098274  |
| 11 | 101291289 | cg02313552 | MEG3:TSS-DMR     | Yes | 0.675593147 | 0.044204628 | 0.542979264  | 0.80820703  | 0.465743214 | -0.179293256 | 0.704912698 | 0.059876498  | 0.688341957 | 0.043305487  |
| 11 | 101291411 | cg02982753 | MEG3:TSS-DMR     | Yes | 0.594414973 | 0.05214712  | 0.497973344  | 0.750856602 | 0.244673827 | -0.321526268 | 0.638920475 | 0.072720379  | 0.63718287  | 0.070982775  |
| 11 | 101291441 | cg02888166 | MEG3:TSS-DMR     | Yes | 0.698083187 | 0.028111709 | 0.617330958  | 0.782435415 | 0.580193251 | -0.086810645 | 0.70808961  | 0.041085714  | 0.716133112 |              |

|    |          |            |                   |     |             |             |             |             |             |              |             |              |              |              |
|----|----------|------------|-------------------|-----|-------------|-------------|-------------|-------------|-------------|--------------|-------------|--------------|--------------|--------------|
| 15 | 23932413 | cg26725891 | NDN:TSS-DMR       | Yes | 0.5632451   | 0.037914082 | 0.449502853 | 0.676987347 | 0.613306567 | 0.07423526   | 0.583197233 | 0.044125926  | 0.549449027  | 0.01037772   |
| 15 | 23932621 | cg18552939 | NDN:TSS-DMR       | Yes | 0.264655379 | 0.053819617 | 1.03196526  | 0.426114231 | 0.253922918 | 0.001609646  | 0.226630168 | -0.025683103 | 0.316360601  | 0.064047329  |
| 15 | 23932627 | cg19089045 | NDN:TSS-DMR       | NA  | 0.225970167 | 0.047008107 | 0.084945845 | 0.366994489 | 0.237512296 | 0.022452094  | 0.181183955 | -0.033876247 | 0.019848349  | 0.023494661  |
| 15 | 23932759 | cg01989224 | NDN:TSS-DMR       | Yes | 0.664390265 | 0.054717029 | 0.500239177 | 0.828541353 | 0.704488706 | 0.072354142  | 0.692246133 | 0.060111568  | 0.607698003  | 0.023436561  |
| 15 | 24142921 | cg06013632 | PWRN4             | Yes | 0.47973423  | 0.039658615 | 0.360758386 | 0.598710074 | 0.474718182 | 0.016542273  | 0.538249057 | 0.080073149  | 0.497614936  | 0.029494227  |
| 15 | 24142936 | cg01250563 | PWRN4             | Yes | 0.468547839 | 0.042612975 | 0.540780912 | 0.596386765 | 0.497417367 | 0.049358271  | 0.472919787 | 0.028066092  | 0.446124788  | 0.001934308  |
| 15 | 24143001 | cg19698403 | PWRN4             | Yes | 0.21557788  | 0.026579487 | 1.335839417 | 0.295316342 | 0.217344456 | 0.011551156  | 0.197949006 | -0.00809929  | 0.229258182  | 0.003644886  |
| 15 | 25068565 | cg22491305 | SNRPN:alt-TSS-DMR | Yes | 0.908793694 | 0.01538494  | 0.862638874 | 0.954948514 | 0.931580814 | 0.061816644  | 0.891443266 | 0.021679096  | 0.516593796  | 0.004915206  |
| 15 | 25068739 | cg11265941 | SNRPN:alt-TSS-DMR | Yes | 0.624980497 | 0.042315496 | 0.480304009 | 0.197524986 | 0.570749079 | -0.026529488 | 0.638838716 | 0.04156015   | 0.664124127  | 0.06684556   |
| 15 | 25068755 | cg18126663 | SNRPN:alt-TSS-DMR | Yes | 0.629850657 | 0.028371785 | 0.544735304 | 0.714966011 | 0.61087785  | 0.009126814  | 0.648973469 | 0.047222343  | 0.630257557  | 0.028456521  |
| 15 | 25068758 | cg24785225 | SNRPN:alt-TSS-DMR | Yes | 0.708542034 | 0.023842291 | 0.623515116 | 0.356568907 | 0.682125354 | 0.00457258   | 0.743360415 | 0.065800742  | 0.701560753  | 0.038054779  |
| 15 | 25068760 | cg10271763 | SNRPN:alt-TSS-DMR | Yes | 0.685742865 | 0.025806458 | 0.608323491 | 0.76316224  | 0.653819067 | -0.002348285 | 0.701797334 | 0.045629982  | 0.701007031  | 0.044902679  |
| 15 | 25068770 | cg27304225 | SNRPN:alt-TSS-DMR | Yes | 0.681764457 | 0.039019024 | 0.564617385 | 0.798731529 | 0.644754888 | -0.007512304 | 0.713580824 | 0.061313632  | 0.710136628  | 0.057869437  |
| 15 | 25068791 | cg19803984 | SNRPN:alt-TSS-DMR | Yes | 0.509711268 | 0.048808212 | 0.363286632 | 0.656135904 | 0.501426365 | -0.016064733 | 0.474697046 | 0.538385063  | 0.530523431  | 0.035805452  |
| 15 | 25069377 | cg26033681 | SNRPN:alt-TSS-DMR | Yes | 0.620696972 | 0.058711311 | 0.444557578 | 0.796836367 | 0.666451555 | 0.075495843  | 0.571723099 | -0.019232614 | 0.596301265  | 0.005345552  |
| 15 | 25093245 | cg25978208 | SNRPN:int1-DMR1   | Yes | 0.576479854 | 0.060019868 | 0.39642025  | 0.756539458 | 0.513828369 | -0.037666122 | 0.682194987 | 0.130700495  | 0.503162247  | -0.048332244 |
| 15 | 25093367 | cg02171545 | SNRPN:int1-DMR1   | Yes | 0.330237943 | 0.058289041 | 0.07437082  | 0.586105066 | 0.284133966 | -0.028633742 | 0.283188421 | -0.029579017 | 0.4449739643 | 0.0135972205 |
| 15 | 25093457 | cg02305723 | SNRPN:int1-DMR1   | Yes | 0.505019909 | 0.06275192  | 0.31676419  | 0.693275669 | 0.461599911 | -0.025513124 | 0.585320917 | 0.098270882  | 0.496597928  | 0.008584894  |
| 15 | 25093522 | cg26278136 | SNRPN:int1-DMR2   | Yes | 0.277352295 | 0.07135265  | 0.062394346 | 0.491410244 | 0.227764502 | -0.038964512 | 0.355507251 | 0.088778237  | 0.234233372  | 0.032495462  |
| 15 | 25123288 | cg27644292 | SNRPN:int1-DMR2   | Yes | 0.680037576 | 0.054291854 | 0.517162015 | 0.842913137 | 0.692837826 | 0.042573871  | 0.738774612 | 0.048510657  | 0.675458232  | 0.007194721  |
| 15 | 25123382 | cg08560373 | SNRPN:int1-DMR2   | Yes | 0.375143916 | 0.087276323 | 0.113314948 | 0.636972885 | 0.390814185 | 0.030243562  | 0.439216028 | 0.078645406  | 0.297741671  | 0.062828952  |
| 15 | 25123492 | cg25657700 | SNRPN:int1-DMR2   | Yes | 0.809552066 | 0.035267293 | 0.704150186 | 0.915753945 | 0.777149075 | 0.001802517  | 0.850895679 | 0.075491222  | 0.817613033  | 0.042266476  |
| 15 | 25123689 | cg01786704 | SNRPN:int1-DMR2   | Yes | 0.520619265 | 0.124390517 | 0.147447715 | 0.893790814 | 0.513424636 | 0.019318138  | 0.503555212 | 0.009448714  | 0.477882676  | 0.016246321  |
| 15 | 25123732 | cg21870668 | SNRPN:int1-DMR2   | Yes | 0.561789882 | 0.063316986 | 0.371838925 | 0.751740839 | 0.527193075 | -0.00830436  | 0.668985451 | 0.133488016  | 0.560017334  | 0.024519899  |
| 15 | 25200134 | cg17910621 | SNURF:TSS-DMR     | NA  | 0.647227168 | 0.025962339 | 0.56934015  | 0.725114186 | 0.614618572 | -0.003932174 | 0.678652137 | 0.060110391  | 0.637805983  | 0.019252537  |
| 15 | 25200146 | cg04072648 | SNURF:TSS-DMR     | NA  | 0.641291456 | 0.032321584 | 0.541596705 | 0.740986206 | 0.647286138 | 0.034108295  | 0.648442982 | 0.03526514   | 0.638800279  | 0.02523247   |
| 15 | 25200203 | cg17503663 | SNURF:TSS-DMR     | NA  | 0.737996683 | 0.0282384   | 0.653281484 | 0.822711882 | 0.741543262 | 0.036162996  | 0.745630896 | 0.04025063   | 0.752191763  | 0.046811497  |
| 15 | 25200254 | cg18506622 | SNURF:TSS-DMR     | Yes | 0.613373509 | 0.043975841 | 0.481445985 | 0.745301033 | 0.619794768 | -0.014834321 | 0.662090195 | 0.075477405  | 0.597380012  | 0.010848222  |
| 15 | 25200407 | cg02125271 | SNURF:TSS-DMR     | Yes | 0.861319399 | 0.016811734 | 0.810884198 | 0.911574601 | 0.849451554 | 0.024474889  | 0.878361114 | 0.053344449  | 0.861493877  | 0.036517212  |
| 15 | 25201021 | cg22159025 | SNURF:TSS-DMR     | Yes | 0.544162658 | 0.045111048 | 0.48829515  | 0.679495802 | 0.604886635 | 0.084201619  | 0.55799387  | 0.143832921  | 0.715498604  | 0.06476862   |
| 15 | 25201225 | cg22555495 | SNURF:TSS-DMR     | Yes | 0.629732015 | 0.035448233 | 0.523387135 | 0.736076715 | 0.613997439 | 0.012597083  | 0.644079613 | 0.042679257  | 0.636311146  | 0.034910789  |
| 15 | 25201430 | cg01614456 | SNURF:TSS-DMR     | Yes | 0.621085372 | 0.039646543 | 0.502685744 | 0.739485    | 0.607340538 | 0.015391703  | 0.640273039 | 0.053121473  | 0.640728139  | 0.048779403  |
| 15 | 25201733 | cg13073261 | SNURF:TSS-DMR     | Yes | 0.512355957 | 0.03116205  | 0.417501145 | 0.607210768 | 0.515122817 | 0.025373482  | 0.54298604  | 0.053236705  | 0.505793195  | 0.01604386   |
| 15 | 25227037 | cg05894557 | PWAR              | Yes | 0.935998743 | 0.017240653 | 0.884276783 | 0.987720703 | 0.927204109 | 0.030860128  | 0.95637821  | 0.06003423   | 0.941934852  | 0.054590871  |
| 15 | 25229257 | cg26410550 | PWAR              | Yes | 0.957160145 | 0.014684996 | 0.913105157 | 1.001215133 | 0.917194434 | 0.054917826  | 0.942254541 | 0.025877933  | 0.969262461  | 0.052885854  |
| 15 | 25229523 | cg02891726 | PWAR              | Yes | 0.968931364 | 0.007095018 | 0.974764631 | 0.990216418 | 0.971575655 | 0.043353376  | 0.975266946 | 0.047046667  | 0.962204352  | 0.033982073  |
| 15 | 25230201 | cg18560144 | PWAR              | Yes | 0.981531789 | 0.004753363 | 0.967271701 | 0.995791877 | 0.988340769 | 0.047962206  | 0.978802281 | 0.076363572  | 0.979962782  | 0.039544074  |
| 15 | 25230296 | cg18488946 | PWAR              | Yes | 0.833766625 | 0.04108521  | 0.710510995 | 0.925022255 | 0.875507895 | 0.027052867  | 0.850063062 | 0.051575598  | 0.852682443  | 0.054227415  |
| 15 | 25230465 | cg13999477 | SNORD116          | Yes | 0.959376402 | 0.014173994 | 0.916854421 | 1.001898382 | 0.942537333 | 0.055706695  | 0.966519494 | 0.016760859  | 0.934107426  | 0.015238791  |
| 15 | 25230572 | cg03381111 | SNORD116          | Yes | 0.82830901  | 0.03149528  | 0.737860428 | 0.918757593 | 0.836889436 | 0.045019125  | 0.794829156 | 0.002958845  | 0.858187511  | 0.0663171    |
| 15 | 25230629 | cg10832166 | SNORD116          | Yes | 0.970469086 | 0.007764243 | 0.947614638 | 0.993491814 | 0.963518238 | 0.033723799  | 0.976257273 | 0.046462834  | 0.975486047  | 0.004991608  |
| 15 | 25230820 | cg22832571 | SNORD116          | Yes | 0.979745479 | 0.006680801 | 0.959703015 | 0.999787884 | 0.985159898 | 0.046385262  | 0.987304134 | 0.048529497  | 0.970649336  | 0.023184699  |
| 15 | 25230857 | cg03709297 | SNORD116          | Yes | 0.972179464 | 0.006495049 | 0.952094318 | 0.99166461  | 0.977356674 | 0.045923363  | 0.979853648 | 0.048420337  | 0.97032978   | 0.03597699   |
| 15 | 25230858 | cg03432464 | SNORD116          | Yes | 0.921910272 | 0.019747874 | 0.862666649 | 0.981153894 | 0.931947182 | 0.049148318  | 0.927907519 | 0.045108655  | 0.904637401  | 0.02183573   |
| 15 | 25230918 | cg03840075 | SNORD116          | Yes | 0.979206434 | 0.005629498 | 0.962317942 | 0.996094927 | 0.985285924 | 0.046744135  | 0.929423615 | 0.04881827   | 0.937648819  | 0.025107031  |
| 15 | 25230973 | cg00475883 | SNORD116          | Yes | 0.985491991 | 0.005171622 | 0.969660506 | 1.001023476 | 0.981841906 | 0.037313812  | 0.99130649  | 0.046778396  | 0.9859583    | 0.041420603  |
| 15 | 25230973 | cg00475883 | SNORD116          | Yes | 0.985491991 | 0.005171622 | 0.969660506 | 1.001023476 | 0.981841906 | 0.037313812  | 0.99130649  | 0.046778396  | 0.9859583    | 0.041420603  |
| 15 | 25230973 | cg00475883 | SNORD116          | Yes | 0.985491991 | 0.005171622 | 0.969660506 | 1.001023476 | 0.981841906 | 0.037313812  | 0.99130649  | 0.046778396  | 0.9859583    | 0.041420603  |
| 15 | 25230973 | cg00475883 | SNORD116          | Yes | 0.985491991 | 0.005171622 | 0.969660506 | 1.001023476 | 0.981841906 | 0.037313812  | 0.99130649  | 0.046778396  | 0.9859583    | 0.041420603  |
| 15 | 25230973 | cg00475883 | SNORD116          | Yes | 0.985491991 | 0.005171622 | 0.969660506 | 1.001023476 | 0.981841906 | 0.037313812  | 0.99130649  | 0.046778396  | 0.9859583    | 0.041420603  |
| 15 | 25230973 | cg00475883 | SNORD116          | Yes | 0.985491991 | 0.005171622 | 0.969660506 | 1.001023476 | 0.981841906 | 0.037313812  | 0.99130649  | 0.046778396  | 0.9859583    | 0.041420603  |
| 15 | 25230973 | cg00475883 | SNORD116          | Yes | 0.985491991 | 0.005171622 | 0.969660506 | 1.001023476 | 0.981841906 | 0.037313812  | 0.99130649  | 0.046778396  | 0.9859583    | 0.041420603  |
| 15 | 25230973 | cg00475883 | SNORD116          | Yes | 0.985491991 | 0.005171622 | 0.969660506 | 1.001023476 | 0.981841906 | 0.037313812  | 0.99130649  | 0.046778396  | 0.9859583    | 0.041420603  |
| 15 | 25230973 | cg00475883 | SNORD116          | Yes | 0.985491991 | 0.005171622 | 0.969660506 | 1.001023476 | 0.981841906 | 0.037313812  | 0.99130649  | 0.046778396  | 0.9859583    | 0.041420603  |
| 15 | 25230973 | cg00475883 | SNORD116          | Yes | 0.985491991 | 0.005171622 | 0.969660506 | 1.001023476 | 0.981841906 | 0.037313812  | 0.99130649  | 0.046778396  | 0.9859583    | 0.041420603  |
| 15 | 25230973 | cg00475883 | SNORD116          | Yes | 0.985491991 | 0.005171622 | 0.969660506 | 1.001023476 | 0.981841906 | 0.037313812  | 0.99130649  | 0.046778396  | 0.9859583    | 0.041420603  |
| 15 | 25230973 | cg00475883 | SNORD116          | Yes | 0.985491991 | 0.005171622 | 0.969660506 | 1.001023476 | 0.981841906 | 0.037313812  | 0.99130649  | 0.046778396  | 0.9859583    | 0.041420603  |
| 15 | 25230973 | cg00475883 | SNORD116          | Yes | 0.985491991 | 0.005171622 | 0           |             |             |              |             |              |              |              |

|    |          |             |                     |     |             |             |             |             |             |              |             |              |             |              |
|----|----------|-------------|---------------------|-----|-------------|-------------|-------------|-------------|-------------|--------------|-------------|--------------|-------------|--------------|
| 16 | 3493615  | cg03933495  | ZNF597:TSS-DMR      | Yes | 0.419640767 | 0.076639347 | 0.189722726 | 0.649558808 | 0.374980848 | -0.024033787 | 0.427511861 | 0.028497226  | 0.449006614 | 0.049991979  |
| 16 | 3493642  | cg24027317  | ZNF597:TSS-DMR      | NA  | 0.571474455 | 0.057215837 | 0.399826943 | 0.743121967 | 0.575848016 | 0.031530925  | 0.576286767 | 0.031969676  | 0.531565389 | -0.012751702 |
| 16 | 3493682  | cg20460547  | ZNF597:TSS-DMR      | Yes | 0.524798627 | 0.055556111 | 0.358130294 | 0.691466959 | 0.501377311 | 0.031474827  | 0.501360024 | 0.000857539  | 0.520306814 | -0.019011919 |
| 16 | 3493688  | cg01344564  | ZNF597:TSS-DMR      | NA  | 0.548289621 | 0.048430826 | 0.402997144 | 0.693582098 | 0.532513308 | 0.008377135  | 0.534338688 | 0.102025144  | 0.542603558 | 0.022067385  |
| 16 | 3493816  | cg02918062  | ZNF597:TSS-DMR      | Yes | 0.509021228 | 0.057892526 | 0.335343665 | 0.682698806 | 0.488672388 | 0.003895396  | 0.514590664 | 0.029813179  | 0.528014133 | 0.043263648  |
| 16 | 3494007  | cg14372630  | ZNF597:TSS-DMR      | NA  | 0.433209964 | 0.046741852 | 0.292884408 | 0.575435252 | 0.365897392 | -0.046326255 | 0.447498339 | 0.035982333  | 0.470665966 | 0.06813595   |
| 16 | 3494095  | cg10406616  | ZNF597:TSS-DMR      | Yes | 0.585070615 | 0.052826258 | 0.411021184 | 0.579923939 | 0.591555277 | 0.033707646  | 0.524487748 | 0.015000117  | 0.476603444 | 0.046215813  |
| 16 | 3494156  | cg06121207  | ZNF597:TSS-DMR      | Yes | 0.582668351 | 0.057609627 | 0.409839471 | 0.755497231 | 0.550645737 | -0.008015466 | 0.58323594  | 0.024560597  | 0.636676161 | 0.078013163  |
| 19 | 5400775  | cg20646939  | ZNF331:alt-TSS-DMR1 | Yes | 0.525767886 | 0.054211572 | 0.36313168  | 0.688402603 | 0.505642573 | 0.053196466  | 0.51694988  | 0.01775899   | 0.547218357 | 0.048012266  |
| 19 | 5400814  | cg06855497  | ZNF331:alt-TSS-DMR1 | Yes | 0.573568947 | 0.047078248 | 0.433342055 | 0.71480369  | 0.549519903 | 0.002793249  | 0.591798232 | 0.045071569  | 0.564391729 | 0.017665075  |
| 19 | 5400819  | cg15576576  | ZNF331:alt-TSS-DMR1 | Yes | 0.592122854 | 0.034260092 | 0.489234257 | 0.694901311 | 0.569474731 | 0.001290381  | 0.605531161 | 0.037346811  | 0.585896728 | 0.017712378  |
| 19 | 5400837  | cg16026074  | ZNF331:alt-TSS-DMR1 | NA  | 0.508979857 | 0.088414318 | 0.243736904 | 0.774222809 | 0.444281961 | -0.038679964 | 0.510008454 | 0.027046529  | 0.542817591 | 0.059855666  |
| 19 | 5401164  | cg22475353  | ZNF331:alt-TSS-DMR1 | Yes | 0.338892829 | 0.031110007 | 0.245562809 | 0.43222285  | 0.329621416 | 0.005307388  | 0.326223187 | 0.001909159  | 0.370190959 | 0.045795531  |
| 19 | 5401252  | cg27296330  | ZNF331:alt-TSS-DMR1 | Yes | 0.318810596 | 0.044278111 | 0.185976263 | 0.45164493  | 0.321639701 | 0.018793644  | 0.320425787 | 0.011757973  | 0.311196142 | 0.005850085  |
| 19 | 5401304  | cg10023249  | ZNF331:alt-TSS-DMR1 | Yes | 0.200711896 | 0.036733398 | 0.090511701 | 0.310912099 | 0.180984794 | -0.013179445 | 0.21720697  | 0.023043732  | 0.201437372 | 0.00723134   |
| 19 | 5401309  | cg15607708  | ZNF331:alt-TSS-DMR1 | Yes | 0.299751289 | 0.035158568 | 0.194275584 | 0.405226994 | 0.279167874 | -0.009344289 | 0.293849405 | 0.005337243  | 0.334430175 | 0.045918012  |
| 19 | 5401399  | cg05338009  | ZNF331:alt-TSS-DMR1 | Yes | 0.448773885 | 0.086975112 | 0.18784855  | 0.709699221 | 0.455948042 | 0.026902489  | 0.449718775 | 0.02673222   | 0.46145604  | 0.032410487  |
| 19 | 5401450  | cg03643149  | ZNF331:alt-TSS-DMR1 | NA  | 0.448898986 | 0.034677392 | 0.344866809 | 0.552931162 | 0.432016408 | 0.001799299  | 0.472426502 | 0.042209321  | 0.456163984 | 0.025946803  |
| 19 | 5401848  | cg14593036  | ZNF331:alt-TSS-DMR1 | NA  | 0.483750558 | 0.055163132 | 0.318261162 | 0.642939953 | 0.478501566 | 0.018051505  | 0.508827671 | 0.04837761   | 0.478243478 | 0.01793417   |
| 19 | 5401857  | cg03499639  | ZNF331:alt-TSS-DMR1 | Yes | 0.547489682 | 0.059252164 | 0.368920189 | 0.760959175 | 0.587098221 | -0.005183716 | 0.58701862  | 0.064836383  | 0.52945757  | 0.0307652    |
| 19 | 54057209 | cg06860848  | ZNF331:alt-TSS-DMR2 | Yes | 0.574460786 | 0.052548867 | 0.416814186 | 0.732107386 | 0.57966416  | 0.033597494  | 0.60013781  | 0.054071145  | 0.547490921 | 0.013242356  |
| 19 | 54057416 | cg03113572  | ZNF331:alt-TSS-DMR2 | Yes | 0.653742512 | 0.065328159 | 0.457578034 | 0.84972699  | 0.606898039 | -0.015819786 | 0.682105161 | 0.059387337  | 0.669574731 | 0.046869606  |
| 19 | 54057616 | cg17223707  | ZNF331:alt-TSS-DMR2 | NA  | 0.599833416 | 0.055156206 | 0.434647977 | 0.765302034 | 0.590204063 | 0.018837837  | 0.615325832 | 0.04399607   | 0.61014648  | 0.028780255  |
| 19 | 54057672 | cg10823956  | ZNF331:alt-TSS-DMR2 | NA  | 0.536456035 | 0.039078944 | 0.419219202 | 0.653692867 | 0.510694148 | -0.00309791  | 0.534630002 | 0.020837944  | 0.538151373 | 0.02359315   |
| 19 | 54057796 | cg19696981  | ZNF331:alt-TSS-DMR2 | Yes | 0.385877182 | 0.034249504 | 0.283128669 | 0.488625695 | 0.332229099 | 0.006457036  | 0.377952988 | 0.011187115  | 0.410953837 | 0.044187964  |
| 19 | 54057795 | cg03490784  | ZNF331:alt-TSS-DMR2 | NA  | 0.531243032 | 0.080078019 | 0.281260959 | 0.771477089 | 0.545789194 | 0.039159857  | 0.52591938  | 0.019290043  | 0.510461043 | 0.07431707   |
| 19 | 54057813 | cg22811518  | ZNF331:alt-TSS-DMR2 | NA  | 0.686406504 | 0.080148682 | 0.445965917 | 0.926847091 | 0.612124485 | -0.041333445 | 0.711821391 | 0.054363461  | 0.71290503  | 0.005447573  |
| 19 | 54057900 | cg21307424  | ZNF331:alt-TSS-DMR2 | NA  | 0.564886961 | 0.032599949 | 0.467807113 | 0.662686809 | 0.566734331 | 0.005127195  | 0.581251004 | 0.039652868  | 0.542513529 | 0.005991393  |
| 19 | 54057917 | cg12551529  | ZNF331:alt-TSS-DMR2 | NA  | 0.524911342 | 0.036515535 | 0.416449377 | 0.633376747 | 0.484733009 | -0.014399754 | 0.54184436  | 0.042711515  | 0.554471649 | 0.025538804  |
| 19 | 54058086 | cg200717427 | ZNF331:alt-TSS-DMR2 | Yes | 0.633995149 | 0.079057567 | 0.460279048 | 0.708711251 | 0.623208251 | 0.020216568  | 0.655578568 | 0.026518987  | 0.626527304 | 0.065237034  |
| 19 | 57348530 | cg14902495  | PEG3:TSS-DMR        | NA  | 0.391372809 | 0.071214395 | 0.17729623  | 0.605015995 | 0.330312817 | -0.038953381 | 0.33458657  | -0.03580742  | 0.473156057 | 0.103898959  |
| 19 | 57349205 | cg15473155  | PEG3:TSS-DMR        | Yes | 0.571026301 | 0.026902527 | 0.49031872  | 0.651733881 | 0.678369762 | 0.025953524  | 0.618764923 | 0.037848685  | 0.527958853 | -0.01117384  |
| 19 | 57349680 | cg19041006  | PEG3:TSS-DMR        | Yes | 0.611109613 | 0.036761275 | 0.500825786 | 0.721393439 | 0.569469937 | -0.014856014 | 0.645056882 | 0.060730931  | 0.602102225 | 0.01776275   |
| 19 | 57349710 | cg17663463  | PEG3:TSS-DMR        | Yes | 0.736398626 | 0.035446882 | 0.630057981 | 0.842739272 | 0.666958243 | -0.036179176 | 0.773129458 | 0.066929039  | 0.770251179 | 0.06738376   |
| 19 | 57349816 | cg19771589  | PEG3:TSS-DMR        | Yes | 0.653393107 | 0.034374963 | 0.550268219 | 0.756517995 | 0.62004533  | -0.004072748 | 0.680813767 | 0.056695688  | 0.646006042 | 0.021887964  |
| 19 | 57350007 | cg02793099  | PEG3:TSS-DMR        | Yes | 0.590415441 | 0.022210995 | 0.523752155 | 0.657078727 | 0.589592354 | 0.020271487  | 0.626929306 | 0.061268439  | 0.571154173 | 0.005493306  |
| 19 | 57350097 | cg01656470  | PEG3:TSS-DMR        | Yes | 0.72816439  | 0.024999354 | 0.653166632 | 0.803162409 | 0.67149878  | 0.00015387   | 0.743461207 | 0.0464452    | 0.736020139 | 0.03900412   |
| 19 | 57350293 | cg17519373  | PEG3:TSS-DMR        | Yes | 0.781373256 | 0.033402466 | 0.681165859 | 0.881580653 | 0.831025823 | 0.084967075  | 0.751978023 | 0.005920901  | 0.879129206 | 0.041072084  |
| 19 | 57350314 | cg18516833  | PEG3:TSS-DMR        | NA  | 0.856139905 | 0.026029213 | 0.778052265 | 0.934272545 | 0.875972037 | 0.056145234  | 0.819502309 | -0.007766599 | 0.867943131 | 0.048114162  |
| 19 | 57350504 | cg07310951  | PEG3:TSS-DMR        | Yes | 0.570518396 | 0.046393975 | 0.431336472 | 0.709700321 | 0.599198896 | 0.056360225  | 0.515052548 | -0.027786123 | 0.590123307 | 0.042784636  |
| 19 | 57351214 | cg20897667  | PEG3:TSS-DMR        | Yes | 0.669328709 | 0.034014213 | 0.56728607  | 0.771371349 | 0.678323834 | 0.038745709  | 0.668352729 | 0.028866044  | 0.670424213 | 0.033954007  |
| 19 | 57351323 | cg02478023  | PEG3:TSS-DMR        | Yes | 0.627955552 | 0.028614586 | 0.542111793 | 0.71379931  | 0.633999033 | 0.032809678  | 0.593166065 | 0.00742329   | 0.66501571  | 0.06426354   |
| 19 | 57351441 | cg22354595  | PEG3:TSS-DMR        | Yes | 0.650629029 | 0.033293808 | 0.550747606 | 0.750510453 | 0.621353539 | 0.001658386  | 0.668080806 | 0.045133653  | 0.675623464 | 0.05412831   |
| 19 | 57351643 | cg19335327  | PEG3:TSS-DMR        | Yes | 0.627204462 | 0.044570303 | 0.493488357 | 0.760920566 | 0.612805556 | 0.014813479  | 0.607558076 | 0.009566     | 0.648059501 | 0.050132425  |
| 19 | 57351792 | cg14849423  | PEG3:TSS-DMR        | Yes | 0.698876939 | 0.032512015 | 0.601344499 | 0.976409378 | 0.677283558 | 0.009983057  | 0.672327245 | 0.010322424  | 0.746416674 | 0.019716173  |
| 19 | 57352015 | cg15777825  | PEG3:TSS-DMR        | Yes | 0.536651949 | 0.018991106 | 0.479678631 | 0.593625267 | 0.530844977 | 0.017023821  | 0.526433305 | 0.012612418  | 0.54611905  | 0.032370479  |
| 19 | 57352022 | cg12205993  | PEG3:TSS-DMR        | Yes | 0.556264496 | 0.027080052 | 0.475024339 | 0.675046252 | 0.557276867 | 0.025354745  | 0.657376236 | 0.025254515  | 0.566175431 | 0.032453309  |
| 19 | 57352075 | cg26349266  | PEG3:TSS-DMR        | Yes | 0.66349256  | 0.018400406 | 0.608291103 | 0.718694017 | 0.655431028 | 0.020884326  | 0.666434514 | 0.03188712   | 0.685619902 | 0.0510732    |
| 19 | 57352135 | cg02162069  | PEG3:TSS-DMR        | Yes | 0.583628216 | 0.03299302  | 0.484694156 | 0.682607276 | 0.561530038 | 0.003778125  | 0.575476092 | 0.017724179  | 0.605411783 | 0.04765987   |
| 19 | 57352143 | cg13960339  | PEG3:TSS-DMR        | Yes | 0.656356466 | 0.039473198 | 0.57956873  | 0.774776059 | 0.673043025 | 0.0474988    | 0.601675472 | -0.023868752 | 0.685452354 | 0.05990163   |
| 19 | 57352177 | cg13369939  | PEG3:TSS-DMR        | Yes | 0.673157275 | 0.025197175 | 0.595765751 | 0.7487488   | 0.695452123 | 0.01538568   | 0.679748202 | 0.035434647  | 0.69381185  | 0.04907663   |
| 19 | 57352186 | cg02062835  | PEG3:TSS-DMR        | Yes | 0.612114968 | 0.035804919 | 0.50470021  | 0.719529276 | 0.597314698 | 0.012075071  | 0.598175519 | 0.012935892  | 0.637314839 | 0.052075213  |
| 19 | 57352253 | cg22294267  | PEG3:TSS-DMR        | Yes | 0.745437377 | 0.015459901 | 0.690972675 | 0.91802079  | 0.739901121 | 0.022972055  | 0.69621033  | 0.04594077   | 0.736400887 | 0.023373931  |
| 19 | 57352270 | cg19008268  | PEG3:TSS-DMR        | Yes | 0.63988415  | 0.038018171 | 0.525829637 | 0.753938663 | 0.640674333 | 0.039806512  | 0.649097662 | 0.03292984   | 0.611577864 | 0.001710043  |
| 19 | 57352466 | cg24844423  | PEG3:TSS-DMR        | Yes | 0.736078401 | 0.039847222 | 0.628124234 | 0.844032567 | 0.699700979 | -0.002507552 | 0.713439866 | 0.029231336  | 0.789524991 | 0.089521646  |
| 19 | 57352520 | cg15678121  | PEG3:TSS-DMR        | Yes | 0.734251487 | 0.038369002 | 0.619144481 | 0.849358492 | 0.747558456 | 0.047544659  | 0.773855449 | 0.073841652  | 0.689527964 | -0.010485833 |
| 19 | 57352543 | cg12032885  | PEG3:TSS-DMR        | Yes | 0.65528734  | 0.020998722 | 0.368032568 | 0.546224901 | 0.450929819 | 0.015150118  | 0.442971251 |              |             |              |



|    |          |             |                     |     |             |             |             |             |             |                    |             |                    |             |                    |
|----|----------|-------------|---------------------|-----|-------------|-------------|-------------|-------------|-------------|--------------------|-------------|--------------------|-------------|--------------------|
| 20 | 42142674 | cg04984575  | L3MBTL1:alt-TSS-DMR | Yes | 0.618430297 | 0.051541541 | 0.463805674 | 0.77305492  | 0.618578262 | 0.028026983        | 0.625975177 | 0.035423898        | 0.609605293 | 0.019054013        |
| 20 | 42142700 | cg02177317  | L3MBTL1:alt-TSS-DMR | Yes | 0.802211346 | 0.023430554 | 0.729189685 | 0.875233007 | 0.786372433 | 0.019630717        | 0.619569574 | <b>0.052827859</b> | 0.80229571  | 0.025553994        |
| 20 | 42142752 | cg020529070 | L3MBTL1:alt-TSS-DMR | Yes | 0.627668487 | 0.060934762 | 0.444864201 | 0.810472772 | 0.602752345 | 0.050245324        | 0.673146339 | <b>0.075293918</b> | 0.622038431 | 0.04353141         |
| 20 | 42142767 | cg10360552  | L3MBTL1:alt-TSS-DMR | Yes | 0.622311945 | 0.031887079 | 0.526650707 | 0.717973183 | 0.594893328 | 3.57239E-05        | 0.637800134 | 0.04294253         | 0.631881037 | 0.037023433        |
| 20 | 42142785 | cg18911945  | L3MBTL1:alt-TSS-DMR | NA  | 0.538779678 | 0.03243285  | 0.441481129 | 0.60878228  | 0.502716433 | -0.014109199       | 0.595892859 | <b>0.079067228</b> | 0.495864838 | 0.020961249        |
| 20 | 42142848 | cg01877937  | L3MBTL1:alt-TSS-DMR | Yes | 0.602742868 | 0.0649951   | 0.407575767 | 0.79728169  | 0.592349959 | 0.019469559        | 0.620731634 | 0.048451234        | 0.605077611 | 0.03211971         |
| 20 | 42142853 | cg04965376  | L3MBTL1:alt-TSS-DMR | Yes | 0.604953766 | 0.062665959 | 0.416955888 | 0.792951633 | 0.631143565 | <b>0.054997446</b> | 0.640192019 | <b>0.0640459</b>   | 0.555968318 | 0.021162938        |
| 20 | 42142898 | cg12699433  | L3MBTL1:alt-TSS-DMR | Yes | 0.563839828 | 0.066615562 | 0.363993143 | 0.763686512 | 0.536329578 | 0.001341901        | 0.611932006 | <b>0.07694433</b>  | 0.542659027 | 0.007611351        |
| 20 | 42142948 | cg11319028  | L3MBTL1:alt-TSS-DMR | Yes | 0.547662603 | 0.067735254 | 0.3445684   | 0.750863866 | 0.535275716 | <b>0.062186426</b> | 0.550916408 | 0.0509245662       | 0.520205824 | 0.006949923        |
| 20 | 42142996 | cg22601123  | L3MBTL1:alt-TSS-DMR | Yes | 0.626907442 | 0.065575423 | 0.43081172  | 0.823633712 | 0.665456535 | <b>0.085840493</b> | 0.579667194 | -0.019948848       | 0.608664259 | 0.009488127        |
| 20 | 42143016 | cg22330467  | L3MBTL1:alt-TSS-DMR | Yes | 0.661137304 | 0.052247658 | 0.603705747 | 0.818567061 | 0.68284398  | 0.033756497        | 0.63290591  | <b>0.07176269</b>  | 0.646630036 | 0.01512135         |
| 20 | 42143046 | cg14306330  | L3MBTL1:alt-TSS-DMR | Yes | 0.496912955 | 0.074547796 | 0.273269567 | 0.720556344 | 0.528815478 | <b>0.056178957</b> | 0.455575255 | -0.017061266       | 0.50855746  | 0.035920939        |
| 20 | 42143081 | cg01071811  | L3MBTL1:alt-TSS-DMR | Yes | 0.695998426 | 0.04798825  | 0.553501951 | 0.838494901 | 0.674084921 | 0.010521875        | 0.752001779 | <b>0.088434233</b> | 0.648726071 | -0.014841476       |
| 20 | 42143097 | cg02611863  | L3MBTL1:alt-TSS-DMR | Yes | 0.677168114 | 0.052722212 | 0.519001478 | 0.83533475  | 0.687138288 | 0.041912563        | 0.694131934 | 0.048906209        | 0.658742511 | -0.013516786       |
| 20 | 42143175 | cg15330298  | L3MBTL1:alt-TSS-DMR | Yes | 0.717329539 | 0.057034031 | 0.546227447 | 0.888431632 | 0.728798611 | 0.034645393        | 0.770432906 | <b>0.085279687</b> | 0.674279254 | -0.010873964       |
| 20 | 42143212 | cg02052111  | L3MBTL1:alt-TSS-DMR | Yes | 0.629100936 | 0.02767164  | 0.546081445 | 0.712120427 | 0.632787893 | 0.034535147        | 0.645361935 | 0.042618139        | 0.597553283 | -0.005190513       |
| 20 | 42143400 | cg15302378  | L3MBTL1:alt-TSS-DMR | Yes | 0.733172804 | 0.06385184  | 0.623417252 | 0.842928357 | 0.753982627 | <b>0.052221708</b> | 0.729543355 | 0.027782437        | 0.726655412 | 0.024894943        |
| 20 | 42143490 | cg09541000  | L3MBTL1:alt-TSS-DMR | Yes | 0.718545802 | 0.049149252 | 0.517098047 | 0.865993557 | 0.679249659 | -0.007029496       | 0.575263686 | <b>0.066357231</b> | 0.694232686 | 0.007955331        |
| 20 | 42143503 | cg02472486  | L3MBTL1:alt-TSS-DMR | Yes | 0.563327834 | 0.03330344  | 0.463417513 | 0.663281155 | 0.5661901   | 0.027247152        | 0.580688899 | <b>0.050425951</b> | 0.527429403 | -0.011515845       |
| 20 | 57414040 | cg04132853  | GNAS-NESP:TSS-DMR   | Yes | 0.694549431 | 0.040894227 | 0.572767649 | 0.818142113 | 0.668775554 | 0.050007207        | 0.719240705 | 0.047072357        | 0.683344332 | 0.020175948        |
| 20 | 57414060 | cg25900051  | GNAS-NESP:TSS-DMR   | Yes | 0.727333255 | 0.032144045 | 0.630911902 | 0.823754609 | 0.707948816 | 0.013097074        | 0.756113359 | <b>0.061261617</b> | 0.653818181 | -0.001269931       |
| 20 | 57414163 | cg00732970  | GNAS-NESP:TSS-DMR   | Yes | 0.578552564 | 0.027472451 | 0.494352515 | 0.658269913 | 0.60297772  | 0.010971766        | 0.573852437 | 0.024526483        | 0.54242944  | 0.004923487        |
| 20 | 57414218 | cg17696847  | GNAS-NESP:TSS-DMR   | Yes | 0.644983944 | 0.046138056 | 0.506569777 | 0.783398111 | 0.608206186 | -0.006474361       | 0.687750436 | <b>0.073069888</b> | 0.609364001 | -0.005316547       |
| 20 | 57414352 | cg20019489  | GNAS-NESP:TSS-DMR   | Yes | 0.84219962  | 0.03073787  | 0.734298609 | 0.934413231 | 0.855044508 | 0.049615344        | 0.851588391 | 0.046159227        | 0.837052547 | 0.031623383        |
| 20 | 57414408 | cg02274728  | GNAS-NESP:TSS-DMR   | Yes | 0.682921755 | 0.042139398 | 0.556205562 | 0.809339947 | 0.66884152  | 0.016396462        | 0.687806618 | 0.035361559        | 0.680426251 | 0.028017953        |
| 20 | 57414530 | cg12054318  | GNAS-NESP:TSS-DMR   | Yes | 0.663031602 | 0.036769039 | 0.552724486 | 0.773338717 | 0.662356769 | 0.028434902        | 0.665766707 | 0.03265474         | 0.654941382 | 0.021019151        |
| 20 | 57414540 | cg25268451  | GNAS-NESP:TSS-DMR   | Yes | 0.707049071 | 0.026468482 | 0.627643623 | 0.786454518 | 0.724244718 | 0.048911573        | 0.713354589 | 0.038021443        | 0.60292888  | 0.014895734        |
| 20 | 57414579 | cg11996914  | GNAS-NESP:TSS-DMR   | Yes | 0.59394352  | 0.023524823 | 0.552396051 | 0.664517988 | 0.586026732 | 0.016115767        | 0.61242122  | 0.046330255        | 0.578507487 | 0.010596222        |
| 20 | 57414597 | cg21330323  | GNAS-NESP:TSS-DMR   | NA  | 0.560915599 | 0.019855455 | 0.501349235 | 0.620481963 | 0.560889839 | 0.024468147        | 0.572479296 | 0.036051233        | 0.557693885 | 0.02217692         |
| 20 | 57414746 | cg17986446  | GNAS-NESP:TSS-DMR   | NA  | 0.714440635 | 0.022084833 | 0.648186135 | 0.695915135 | 0.718271677 | 0.036346332        | 0.70897495  | 0.026599606        | 0.705592869 | 0.032127524        |
| 20 | 57414885 | cg06163629  | GNAS-NESP:TSS-DMR   | Yes | 0.563110688 | 0.025856066 | 0.485542489 | 0.640678887 | 0.574600556 | 0.033442403        | 0.562619427 | 0.02146127         | 0.548297348 | 0.007139284        |
| 20 | 57415145 | cg00765653  | GNAS-NESP:TSS-DMR   | Yes | 0.588309518 | 0.01777775  | 0.644916912 | 0.67126844  | 0.607470779 | 0.041752607        | 0.570909403 | 0.013054231        | 0.584997386 | 0.022042152        |
| 20 | 57415178 | cg14728233  | GNAS-NESP:TSS-DMR   | Yes | 0.642586017 | 0.020277183 | 0.55154469  | 0.703417565 | 0.635237821 | 0.019015862        | 0.655642697 | 0.039420738        | 0.647017147 | 0.030795188        |
| 20 | 57415378 | cg05558390  | GNAS-NESP:TSS-DMR   | Yes | 0.368023763 | 0.021340854 | 0.3040012   | 0.432046326 | 0.379553265 | 0.020501789        | 0.3594011   | 0.005949623        | 0.353509462 | 0.579854E-05       |
| 20 | 57415698 | cg19296354  | GNAS-NESP:TSS-DMR   | Yes | 0.617449505 | 0.041165731 | 0.493952313 | 0.740946698 | 0.615865596 | 0.026242669        | 0.611640377 | 0.02201745         | 0.638058431 | 0.048435504        |
| 20 | 57415956 | cg15725616  | GNAS-NESP:TSS-DMR   | NA  | 0.610685089 | 0.04044094  | 0.489362267 | 0.73200971  | 0.597224235 | 0.015346851        | 0.56677463  | -0.015102754       | 0.614288948 | <b>0.06031069</b>  |
| 20 | 57417997 | cg18035618  | GNAS-NESP:TSS-DMR   | NA  | 0.688933607 | 0.036794666 | 0.574896908 | 0.790017605 | 0.675267516 | 0.016896362        | 0.683564886 | 0.025193712        | 0.771278394 | <b>0.053907219</b> |
| 20 | 57416222 | cg24975842  | GNAS-NESP:TSS-DMR   | Yes | 0.546384344 | 0.025917409 | 0.46859117  | 0.624100571 | 0.562445603 | 0.039605009        | 0.541268587 | 0.017887992        | 0.540237789 | 0.016857194        |
| 20 | 57416507 | cg18619382  | GNAS-NESP:TSS-DMR   | Yes | 0.56239112  | 0.03908367  | 0.445118108 | 0.679620131 | 0.542979589 | 0.006072519        | 0.549291904 | 0.008198434        | 0.583495337 | 0.046771064        |
| 20 | 57416889 | cg01355739  | GNAS-NESP:TSS-DMR   | Yes | 0.676001475 | 0.030942832 | 0.584522978 | 0.764779972 | 0.696564883 | 0.02485535         | 0.675416611 | 0.030137262        | 0.63861672  | 0.038337371        |
| 20 | 57417234 | cg20582984  | GNAS-NESP:TSS-DMR   | Yes | 0.775905959 | 0.029791861 | 0.686530916 | 0.862581002 | 0.665060733 | 0.024934587        | 0.718258461 | 0.045886314        | 0.786049334 | 0.044477187        |
| 20 | 57418016 | cg18949315  | GNAS-NESP:TSS-DMR   | Yes | 0.611087925 | 0.041567641 | 0.486385001 | 0.735790848 | 0.617823789 | 0.035212525        | 0.626979456 | 0.043368192        | 0.585526663 | 0.00291399         |
| 20 | 57418374 | cg02544157  | GNAS-NESP:TSS-DMR   | NA  | 0.473799978 | 0.033168708 | 0.374293855 | 0.573306102 | 0.460366892 | 0.033915724        | 0.464309968 | 0.0131588          | 0.460070781 | 0.01586014         |
| 20 | 57425980 | cg18935491  | GNAS-ALT:TSS-DMR    | Yes | 0.687087114 | 0.024603454 | 0.613276751 | 0.760897478 | 0.651705308 | -0.006479937       | 0.674790673 | 0.016605248        | 0.706656986 | 0.048471742        |
| 20 | 57425987 | cg24203465  | GNAS-ALT:TSS-DMR    | Yes | 0.59608806  | 0.035687416 | 0.60925812  | 0.703150308 | 0.566286484 | -0.002986663       | 0.608298784 | 0.039025637        | 0.61261956  | 0.043346412        |
| 20 | 57425995 | cg26102503  | GNAS-ALT:TSS-DMR    | Yes | 0.636676202 | 0.042859043 | 0.515221192 | 0.758131212 | 0.57170983  | -0.035215686       | 0.651738062 | 0.044848346        | 0.65886105  | <b>0.051290389</b> |
| 20 | 57426132 | cg03344105  | GNAS-ALT:TSS-DMR    | Yes | 0.653745138 | 0.030264065 | 0.558585678 | 0.751633528 | 0.632438547 | 0.007933766        | 0.68171735  | <b>0.05712268</b>  | 0.626138523 | 0.01065374         |
| 20 | 57426139 | cg14660776  | GNAS-ALT:TSS-DMR    | Yes | 0.550345236 | 0.03730164  | 0.438440317 | 0.662205156 | 0.531830556 | 0.007086151        | 0.552071234 | 0.027326829        | 0.59692724  | 0.034882835        |
| 20 | 57426216 | cg19592829  | GNAS-ALT:TSS-DMR    | Yes | 0.751812584 | 0.024020117 | 0.679211932 | 0.824413236 | 0.742870935 | 0.023681024        | 0.74754589  | 0.023681024        | 0.761484958 | 0.042295048        |
| 20 | 57426265 | cg09123158  | GNAS-ALT:TSS-DMR    | Yes | 0.81627117  | 0.034573479 | 0.712550732 | 0.919991608 | 0.774963675 | -0.005598178       | 0.869333839 | <b>0.088371985</b> | 0.800912966 | 0.026351113        |
| 20 | 57426275 | cg19140375  | GNAS-ALT:TSS-DMR    | NA  | 0.314102867 | 0.061376919 | 0.129972109 | 0.483232625 | 0.60606395  | -0.048401598       | 0.942020986 | <b>0.095194993</b> | 0.386858894 | 0.0018509          |
| 20 | 57426323 | cg11669839  | GNAS-ALT:TSS-DMR    | Yes | 0.505042235 | 0.042066601 | 0.378842432 | 0.631242038 | 0.475801362 | -0.005400674       | 0.675928841 | -0.00273195        | 0.528029885 | 0.046827848        |
| 20 | 57426369 | cg17841572  | GNAS-ALT:TSS-DMR    | Yes | 0.598256155 | 0.03228635  | 0.50157041  | 0.69492422  | 0.549273615 | -0.022704176       | 0.43664644  | <b>0.064666639</b> | 0.61218087  | 0.02230386         |
| 20 | 57426375 | cg25293206  | GNAS-ALT:TSS-DMR    | Yes | 0.64864165  | 0.030737248 | 0.556429906 | 0.740853399 | 0.63300881  | 0.015014845        | 0.665191353 | 0.044905317        | 0.660918528 | 0.040632492        |
| 20 | 57426384 | cg14482474  | GNAS-ALT:TSS-DMR    | Yes | 0.638619036 | 0.032956511 | 0.539749504 | 0.737488569 | 0.603295538 | -0.007056859       | 0.636824039 | 0.026471643        | 0.662314478 | <b>0.051962802</b> |
| 20 | 57426392 | cg08168683  | GNAS-ALT:TSS-DMR    | Yes | 0.646847322 | 0.024627627 | 0.574045522 | 0.719649123 | 0.641206317 | 0.020935913        | 0.673259281 | <b>0.052988877</b> | 0.629715541 | 0.009445137        |

|    |          |             |                          |     |             |             |              |             |             |              |             |              |             |              |
|----|----------|-------------|--------------------------|-----|-------------|-------------|--------------|-------------|-------------|--------------|-------------|--------------|-------------|--------------|
| 20 | 57463456 | cg20008140  | <b>GNAS-A/B:TSS-DMR</b>  | Yes | 0.664602471 | 0.047937623 | 0.520789603  | 0.80841534  | 0.624056313 | -0.010267509 | 0.651615448 | 0.017291626  | 0.687370926 | 0.053047104  |
| 20 | 57463504 | cg11480267  | <b>GNAS-A/B:TSS-DMR</b>  | Yes | 0.630934235 | 0.075757673 | 0.403661216  | 0.858207255 | 0.686434613 | 0.086006781  | 0.499038187 | -0.101389645 | 0.681599934 | 0.081172102  |
| 20 | 57463528 | cg10011623  | <b>GNAS-A/B:TSS-DMR</b>  | Yes | 0.867350062 | 0.022407814 | 0.800126621  | 0.934573502 | 0.864228536 | 0.033750236  | 0.888475479 | 0.057997179  | 0.848485687 | 0.018007387  |
| 20 | 57463531 | cg01748573  | <b>GNAS-A/B:TSS-DMR</b>  | Yes | 0.601805382 | 0.028513549 | 0.516264735  | 0.687346029 | 0.570246269 | -0.005337131 | 0.600218953 | 0.024635552  | 0.618851486 | 0.043268805  |
| 20 | 57463573 | cg17334845  | <b>GNAS-A/B:TSS-DMR</b>  | Yes | 0.536661076 | 0.042888577 | 0.407995345  | 0.665326807 | 0.538599464 | 0.027971246  | 0.517162409 | 0.006534191  | 0.542100343 | 0.031472124  |
| 20 | 57463616 | cg26769900  | <b>GNAS-A/B:TSS-DMR</b>  | Yes | 0.537638873 | 0.03483059  | 0.433147103  | 0.642130643 | 0.569387256 | 0.055388763  | 0.528887784 | 0.01488929   | 0.544530305 | 0.030531811  |
| 20 | 57463654 | cg17652507  | <b>GNAS-A/B:TSS-DMR</b>  | Yes | 0.566560754 | 0.034235634 | 0.46385385   | 0.669267657 | 0.586716295 | 0.045211003  | 0.54764757  | 0.006142278  | 0.576684959 | 0.035179667  |
| 20 | 57463659 | cg22407822  | <b>GNAS-A/B:TSS-DMR</b>  | Yes | 0.639615499 | 0.035479615 | 0.533176654  | 0.746054343 | 0.628871882 | 0.014497089  | 0.627707325 | 0.013332532  | 0.667219498 | 0.052844705  |
| 20 | 57463712 | cg07341934  | <b>GNAS-A/B:TSS-DMR</b>  | Yes | 0.631005868 | 0.040826029 | 0.508527781  | 0.753483954 | 0.592474694 | -0.010109649 | 0.640107481 | 0.07523138   | 0.638950186 | 0.036365843  |
| 20 | 57463714 | cg02107718  | <b>GNAS-A/B:TSS-DMR</b>  | Yes | 0.600156542 | 0.044682283 | 0.466109694  | 0.73420339  | 0.566733258 | -0.005567079 | 0.605976776 | 0.033676439  | 0.612846718 | 0.04054638   |
| 20 | 57463726 | cg123496597 | <b>GNAS-A/B:TSS-DMR</b>  | Yes | 0.553435075 | 0.029440604 | 0.480221263  | 0.626648887 | 0.559213989 | 0.027944841  | 0.548519788 | 0.017250639  | 0.563659441 | 0.022390292  |
| 20 | 57463764 | cg25308079  | <b>GNAS-A/B:TSS-DMR</b>  | Yes | 0.648081092 | 0.01974555  | 0.588844443  | 0.707317741 | 0.658474707 | 0.037273122  | 0.642916847 | 0.021715262  | 0.636041191 | 0.014839605  |
| 20 | 57463776 | cg09772382  | <b>GNAS-A/B:TSS-DMR</b>  | Yes | 0.66502618  | 0.019254207 | 0.607263559  | 0.722788802 | 0.651018389 | 0.014544774  | 0.639741343 | 0.003267728  | 0.690515792 | 0.054042177  |
| 20 | 57463784 | cg15222215  | <b>GNAS-A/B:TSS-DMR</b>  | Yes | 0.598484151 | 0.020580159 | 0.536743673  | 0.660224629 | 0.614467721 | 0.041295817  | 0.581500143 | 0.00832824   | 0.596620319 | 0.023448416  |
| 20 | 57463788 | cg14263118  | <b>GNAS-A/B:TSS-DMR</b>  | Yes | 0.601989726 | 0.020683443 | 0.539939396  | 0.664040057 | 0.586527575 | 0.009393478  | 0.619712386 | 0.02547829   | 0.598345855 | 0.021211759  |
| 20 | 57463901 | cg11244758  | <b>GNAS-A/B:TSS-DMR</b>  | Yes | 0.584443472 | 0.029182292 | 0.518496597  | 0.650390348 | 0.582884369 | 0.023940165  | 0.578967392 | 0.020064188  | 0.601191738 | 0.042288534  |
| 20 | 57463907 | cg05926269  | <b>GNAS-A/B:TSS-DMR</b>  | Yes | 0.773655271 | 0.026868016 | 0.693051225  | 0.854259318 | 0.779192916 | 0.038654158  | 0.775245449 | 0.034706691  | 0.767069152 | 0.026530394  |
| 20 | 57463926 | cg03821543  | <b>GNAS-A/B:TSS-DMR</b>  | Yes | 0.480551257 | 0.031948702 | 0.384705152  | 0.576397362 | 0.471792317 | 0.013041225  | 0.486863433 | 0.028112342  | 0.510941921 | 0.052190829  |
| 20 | 57463975 | cg01538522  | <b>GNAS-A/B:TSS-DMR</b>  | Yes | 0.451695757 | 0.046759413 | 0.311417517  | 0.591973997 | 0.466488154 | 0.037507105  | 0.406621509 | -0.02235954  | 0.473694739 | 0.044713609  |
| 20 | 57463985 | cg00267746  | <b>GNAS-A/B:TSS-DMR</b>  | Yes | 0.475924634 | 0.027780419 | 0.392583378  | 0.559265889 | 0.472287384 | 0.017508777  | 0.488711856 | 0.033933242  | 0.466748664 | 0.01197005   |
| 20 | 57464001 | cg03837903  | <b>GNAS-A/B:TSS-DMR</b>  | Yes | 0.556024819 | 0.064709403 | 0.361896609  | 0.750153029 | 0.594891359 | 0.065664239  | 0.454823493 | -0.074403627 | 0.615258293 | 0.086031173  |
| 20 | 57464003 | cg23159236  | <b>GNAS-A/B:TSS-DMR</b>  | Yes | 0.413919167 | 0.029512473 | 0.325381747  | 0.502456587 | 0.422102994 | -0.02436618  | 0.371998526 | -0.02436618  | 0.437117166 | 0.040752461  |
| 20 | 57464130 | cg22798925  | <b>GNAS-A/B:TSS-DMR</b>  | Yes | 0.538786449 | 0.027966919 | 0.454885694  | 0.622687205 | 0.52142282  | 0.005622078  | 0.529725757 | 0.013925015  | 0.551379945 | 0.03579203   |
| 20 | 57464572 | cg20126878  | <b>GNAS-A/B:TSS-DMR</b>  | Yes | 0.565542136 | 0.040878962 | 0.442905249  | 0.688179022 | 0.548839565 | 0.00962725   | 0.548147941 | 0.008935626  | 0.580110094 | 0.040897778  |
| 20 | 57464743 | cg027207803 | <b>GNAS-A/B:TSS-DMR</b>  | Yes | 0.662595908 | 0.039503128 | 0.544086525  | 0.781105292 | 0.649060117 | 0.017022715  | 0.658271208 | 0.026233806  | 0.686664719 | 0.054627318  |
| 20 | 57464971 | cg08997444  | <b>GNAS-A/B:TSS-DMR</b>  | Yes | 0.74107729  | 0.031657441 | 0.646104966  | 0.836049613 | 0.721697946 | -0.013825254 | 0.723812293 | 0.0159396    | 0.76255655  | 0.054683857  |
| 20 | 57464974 | cg22639787  | <b>GNAS-A/B:TSS-DMR</b>  | Yes | 0.726015138 | 0.02754255  | 0.643387487  | 0.808642789 | 0.680953813 | -0.012661103 | 0.745079687 | 0.051464861  | 0.733003406 | 0.039388579  |
| 20 | 57465124 | cg05960039  | <b>GNAS-A/B:TSS-DMR</b>  | Yes | 0.362876016 | 0.026644555 | 0.282942351  | 0.442809681 | 0.366046789 | 0.019334015  | 0.369418627 | -0.02705243  | 0.332377818 | -0.014335566 |
| 20 | 57465126 | cg09604333  | <b>GNAS-A/B:TSS-DMR</b>  | Yes | 0.452138529 | 0.023077855 | 0.382904965  | 0.521372093 | 0.448177477 | 0.015847928  | 0.422758366 | -0.009571183 | 0.470972702 | 0.038643153  |
| 20 | 57465133 | cg06047881  | <b>GNAS-A/B:TSS-DMR</b>  | Yes | 0.544120868 | 0.045315028 | 0.408175784  | 0.680065952 | 0.551235095 | 0.031337634  | 0.524315033 | 0.004417572  | 0.567540112 | 0.04764265   |
| 20 | 57465140 | cg20018057  | <b>GNAS-A/B:TSS-DMR</b>  | Yes | 0.52201858  | 0.047077437 | 0.380786269  | 0.66325089  | 0.544233299 | 0.045558698  | 0.470236584 | -0.028438017 | 0.533341934 | 0.034667333  |
| 20 | 57465176 | cg10748817  | <b>GNAS-A/B:TSS-DMR</b>  | Yes | 0.579010419 | 0.028169527 | 0.494501837  | 0.663519    | 0.551523097 | -0.001089257 | 0.58757879  | 0.013366436  | 0.606940197 | 0.050727842  |
| 21 | 15352609 | cg00566515  | ANKRD20A11P              | Yes | 0.294193795 | 0.09558584  | 0.007436275  | 0.580951316 | 0.445781356 | 0.160553196  | 0.231253865 | -0.053074294 | 0.347471322 | 0.062243162  |
| 21 | 15352849 | cg02197629  | ANKRD20A11P              | Yes | 0.388582627 | 0.136907375 | -0.022139498 | 0.799304753 | 0.711271152 | 0.332154159  | 0.348155501 | -0.030961492 | 0.331622708 | -0.047494285 |
| 21 | 15436261 | cg25507885  | LIPI                     | Yes | 0.858512196 | 0.025103828 | 0.783200711  | 0.933823681 | 0.876554155 | 0.055981164  | 0.876889892 | 0.056316901  | 0.863227109 | 0.042654118  |
| 21 | 15456606 | cg19509405  | LIPI                     | Yes | 0.991560837 | 0.003107619 | 0.982379799  | 1.000883694 | 0.991584852 | 0.041366073  | 0.990497187 | 0.040278408  | 0.99561874  | 0.04539996   |
| 21 | 15457267 | cg24114772  | LIPI                     | Yes | 0.978512119 | 0.003707508 | 0.967389596  | 0.989634642 | 0.981476881 | 0.043853473  | 0.978913897 | 0.041290489  | 0.977692584 | 0.040069176  |
| 21 | 40757692 | cg00606841  | <b>WRB:alt-TSS-DMR</b>   | Yes | 0.671455348 | 0.049243202 | 0.523725742  | 0.819184954 | 0.60029097  | -0.039703013 | 0.69488256  | 0.054888578  | 0.70174356  | 0.061749578  |
| 21 | 40757900 | cg26710963  | <b>WRB:alt-TSS-DMR</b>   | Yes | 0.55027174  | 0.044604284 | 0.416458889  | 0.684084591 | 0.522390648 | -0.000724579 | 0.574154414 | 0.051039187  | 0.55825257  | 0.035137343  |
| 21 | 40758209 | cg09916765  | <b>WRB:alt-TSS-DMR</b>   | Yes | 0.351325964 | 0.084025072 | 0.099250747  | 0.603401181 | 0.376594401 | 0.040175846  | 0.406221633 | 0.069803077  | 0.249018684 | 0.087399872  |
| 22 | 42077940 | cg06781532  | <b>SNU13:alt-TSS-DMR</b> | Yes | 0.745434717 | 0.040246784 | 0.624694366  | 0.866175067 | 0.761821    | 0.047675372  | 0.733011084 | 0.018865456  | 0.774276926 | 0.060131298  |
| 22 | 42078218 | cg18152773  | <b>SNU13:alt-TSS-DMR</b> | Yes | 0.483397619 | 0.051482852 | 0.328949062  | 0.637846177 | 0.459014181 | -0.001627292 | 0.455320115 | -0.005321359 | 0.52733809  | 0.066696617  |
| 22 | 42078331 | cg05871614  | <b>SNU13:alt-TSS-DMR</b> | Yes | 0.586945538 | 0.059696579 | 0.407855802  | 0.766035274 | 0.584685701 | 0.024662841  | 0.578473013 | 0.018450153  | 0.588315613 | 0.028292753  |
| 22 | 42078366 | cg22083753  | <b>SNU13:alt-TSS-DMR</b> | Yes | 0.536060223 | 0.057957854 | 0.36213266   | 0.709879785 | 0.491772575 | -0.019145863 | 0.527342388 | 0.01642395   | 0.595814744 | 0.084896306  |
| 22 | 42078389 | cg15284719  | <b>SNU13:alt-TSS-DMR</b> | Yes | 0.500105079 | 0.051468703 | 0.345698969  | 0.65451119  | 0.484964526 | 0.007152359  | 0.508601238 | 0.030789071  | 0.513921552 | 0.036109385  |
| 22 | 42078568 | cg08686092  | <b>SNU13:alt-TSS-DMR</b> | Yes | 0.523900565 | 0.057983443 | 0.349950237  | 0.697850893 | 0.530387508 | 0.029963968  | 0.528025837 | 0.027602296  | 0.508761621 | 0.008338081  |
| 22 | 42078708 | cg11677105  | <b>SNU13:alt-TSS-DMR</b> | Yes | 0.411047251 | 0.072603294 | 0.193237368  | 0.628857134 | 0.376576105 | -0.017176314 | 0.411627079 | 0.01787466   | 0.404867605 | 0.01115187   |

DMR, Differentially methylated region; 450k, Illumina 450K BeadChip Arrays; and SD, standard deviation.

The names of DMRs are based on the previous reports by Monk et al. [1] and Joshi et al. [2].

DMRs shown in bold letters are described in Monk et al. or in both Monk et al. and Joshi et al., and those shown in plain letters are described in Joshi et al. but not in Monk et al.

Beta values < mean - 3 SD and > mean + 3 SD are written in green and red numbers, respectively.

Delta beta values < 0.05 and > 0.05 are highlighted with green and red backgrounds, respectively.

The probes with age-related drift and sex-bias have been excluded.

## References

- Monk D, Morales J, den Dunnen JT, Russo S, Court F, Prawitt D, et al. Recommendations for a nomenclature system for reporting methylation aberrations in imprinted domains. *Epigenetics*. 2018;13:117–21.
- Joshi RS, Garg P, Zaitlen N, Lappalainen T, Watson CT, Azam N, et al. DNA Methylation Profiling of Uniparental Disomy Subjects Provides a Map of Parental Epigenetic Bias in the Human Genome. *Am J Hum Genet*. 2016;99:555–66.
