# Supplementary material for: ZNF445: a homozygous truncating variant in a patient with Temple syndrome and multilocus imprinting disturbance
Source: PubMed Central journal article supplement (PMC8157728; doi:10.1186/s13148-021-01106-5), 2021-05-26
Supplement: 13148_2021_1106_MOESM4_ESM.pdf [file 13148_2021_1106_MOESM4_ESM.pdf]

**Table S4.** The list of abnormally methylated 24 probes (CpGs) on non-iDMRs.

| Chr. | Genomic position | Target ID  | Mean $\beta$ values in controls | SD         | Mean + 3 SD | Mean - 3 SD | $\beta$ values Patient | Delta- $\beta$ Patient | CpG island*               | Relative position to CpG island† | Gene near the CpG island   |
|------|------------------|------------|---------------------------------|------------|-------------|-------------|------------------------|------------------------|---------------------------|----------------------------------|----------------------------|
| 1    | 1914597          | cg18270426 | 0.93260524                      | 0.01787403 | 0.98622734  | 0.87898314  | 0.8781859              | -0.05441934            | chr1:1910268-1913800      | South Shore                      | <i>KIAA1751</i>            |
| 1    | 20696747         | cg11417178 | 0.90511118                      | 0.0265362  | 0.98471979  | 0.82550256  | 0.818985               | -0.08612618            | chr1:20692582-20693534    | South Shelf                      |                            |
| 2    | 118616155        | cg25619440 | 0.91010796                      | 0.02473747 | 0.98432037  | 0.83589554  | 0.8104967              | -0.09961126            | chr2:118616575-118618163  | North Shore                      |                            |
| 2    | 218843411        | cg13711385 | 0.91341694                      | 0.0288209  | 0.99987963  | 0.82695425  | 0.8235939              | -0.08982304            | chr2:218843460-218843742  | North Shore                      |                            |
| 5    | 172662741        | cg03625415 | 0.21249239                      | 0.0563137  | 0.38143348  | 0.04355129  | 0.527005               | 0.31451261             | chr5:172663616-172664584  | North Shore                      | <i>NKX2-5</i>              |
| 6    | 170478393        | cg06391732 | 0.84738729                      | 0.03004668 | 0.93752733  | 0.75724725  | 0.7536973              | -0.09368999            | chr6:170474406-170475553  | South Shelf                      |                            |
| 6    | 170478454        | cg19680631 | 0.90813458                      | 0.01723893 | 0.95985138  | 0.85641777  | 0.8412939              | -0.06684067            | chr6:170474406-170475553  | South Shelf                      |                            |
| 7    | 2592339          | cg08092333 | 0.93495116                      | 0.01974107 | 0.99417438  | 0.87572794  | 0.8457728              | -0.08917836            | chr7:2594724-2595538      | North Shelf                      | <i>C7orf27</i>             |
| 8    | 1054899          | cg23984176 | 0.83232428                      | 0.04746852 | 0.97472985  | 0.68991872  | 0.6842682              | -0.14805608            | chr8:1053354-1053804      | South Shore                      |                            |
| 10   | 124133822        | cg10576280 | 0.12479224                      | 0.03707881 | 0.23602866  | 0.01355581  | 0.3074526              | 0.18266036             | chr10:124134088-124134933 | North Shore                      | <i>PLEKHA1</i>             |
| 10   | 134943309        | cg25142028 | 0.7964697                       | 0.03827707 | 0.9113009   | 0.6816385   | 0.6733098              | -0.1231599             | chr10:134944511-134944792 | North Shore                      | <i>GPR123</i>              |
| 11   | 430036           | cg16362232 | 0.90942373                      | 0.02521472 | 0.98506788  | 0.83377957  | 0.8177336              | -0.09169013            | chr11:430814-431775       | North Shore                      | <i>ANO9</i>                |
| 11   | 1108632          | cg04531584 | 0.71429302                      | 0.05086846 | 0.86689838  | 0.56168765  | 0.556056               | -0.15823702            | chr11:1107802-1108041     | South Shore                      |                            |
| 11   | 61583871         | cg20295071 | 0.05528314                      | 0.01290366 | 0.09399411  | 0.01657218  | 0.00120796             | -0.05407518            | chr11:61582573-61584728   | CpG island                       | <i>MIR1908;FADS2;FADS1</i> |
| 13   | 112630399        | cg09717927 | 0.87752055                      | 0.0244472  | 0.95086214  | 0.80417897  | 0.7966517              | -0.08086885            | chr13:112630568-112630796 | North Shore                      |                            |
| 14   | 102101660        | cg19571540 | 0.89517326                      | 0.03055704 | 0.98684437  | 0.80350215  | 0.7598878              | -0.13528546            | chr14:102101165-102101596 | South Shore                      |                            |
| 14   | 105120586        | cg10793244 | 0.95137386                      | 0.01179816 | 0.98676835  | 0.91597938  | 0.8496499              | -0.10172396            | chr14:105119773-105120005 | South Shore                      |                            |
| 15   | 41524250         | cg08173216 | 0.29851026                      | 0.08198841 | 0.54447547  | 0.05254504  | 0.00378449             | -0.29472577            | chr15:41522828-41523732   | South Shore                      | <i>CHP;EXD1</i>            |
| 16   | 88496476         | cg07745707 | 0.85897398                      | 0.04448464 | 0.99242789  | 0.72552007  | 0.7221273              | -0.13684668            | chr16:88496201-88497763   | CpG island                       | <i>ZNF469</i>              |
| 17   | 19771783         | cg04036329 | 0.94343477                      | 0.01505712 | 0.98860615  | 0.8982634   | 0.8931007              | -0.05033407            | chr17:19771609-19771814   | CpG island                       | <i>ULK2</i>                |
| 18   | 76766007         | cg16152072 | 0.8992147                       | 0.02586565 | 0.97681164  | 0.82161776  | 0.8197969              | -0.0794178             | chr18:76765747-76766833   | CpG island                       |                            |
| 20   | 60527061         | cg12751644 | 0.75751243                      | 0.07996424 | 0.99740515  | 0.51761972  | 0.4896641              | -0.26784833            | chr20:60518033-60523876   | South Shelf                      |                            |
| 22   | 36959492         | cg21569107 | 0.92162856                      | 0.01808392 | 0.97588032  | 0.86737679  | 0.8668609              | -0.05476766            | chr22:36960369-36961054   | North Shore                      | <i>CACNG2</i>              |
| 22   | 50705546         | cg09778961 | 0.83521201                      | 0.04854833 | 0.980857    | 0.68956702  | 0.6635463              | -0.17166571            | chr22:50705406-50706553   | CpG island                       | <i>MAPK11</i>              |

The 24 probes are associated with  $|\beta|$  of  $> 3$  SD of the mean and  $|\Delta\beta|$  of  $> 0.05$ .

Beta values  $< \text{mean} - 3 \text{ SD}$  and  $> \text{mean} + 3 \text{ SD}$  are written in green and red numbers, respectively.

Delta beta values  $< 0.05$  and  $> 0.05$  are highlighted with green and red backgrounded, respectively.

The probes with age-related drift and sex-bias have been excluded.

\* CpG island nearest to the probe (according to the UCSC genome browser).

† For the definition of north and south shores and shelves, see Figure S2.
