# Supplementary material for: ZNF445: a homozygous truncating variant in a patient with Temple syndrome and multilocus imprinting disturbance
Source: PubMed Central journal article supplement (PMC8157728; doi:10.1186/s13148-021-01106-5), 2021-05-26
Supplement: 13148_2021_1106_MOESM5_ESM.pdf [file 13148_2021_1106_MOESM5_ESM.pdf]

**Table S5. Primers utilized in the present study.**

|                              | Forward primer                 | Reverse primer                      | Sequence primer           |
|------------------------------|--------------------------------|-------------------------------------|---------------------------|
| <Pyrosequencing>             |                                |                                     |                           |
| <i>PLAGL1</i> :alt-TSS-DMR   | GGGGTAGTYGTGTTTATAGTTTAG       | biotin-CCCAAACACCTACCCTAC           | GGGTAGTYGTGTTTATAGTTTAGT  |
| <i>MEST</i> :alt-TSS-DMR     | GTGTGGTTGGYGGTTTTGGGATTA       | biotin-ACACCCCTCCTCAAATA            | TGTTTTTGGGYGAAAAATTTAT    |
| <i>PEG10</i> :TSS-DMR        | AGAAATTTGATTGYGTTTTGAGGAGAATA  | biotin-ACAAAAAATAAAAAATCCCACACCTTAA | AGTTTGGAGAAAGGTT          |
| <i>H19/IGF2</i> :IG-DMR-1    | TTTGGGAGAGTTTGTGAGG            | biotin-CCCCAAACCRATTCCCATCCAATTA    | GRTAATATGYGGTTTTTAGATAGG  |
| <i>H19/IGF2</i> :IG-DMR-2    | GGGTTTTYGGAGGTTTTTGGGAATA      | biotin-ACTTAAATCCCAAACCATAACAC      | GGAATAGGAYGTTTATGGGAG     |
| <i>KCNQ1OT1</i> :TSS-DMR     | GGATTTAGAATTAYGATGYGGATTTTA    | biotin-TCCCATCTACACCTATAAACA        | TTTTGAATTATTATGAGAATTATAG |
| <i>MEG3/DLK1</i> :IG-DMR     | ATTTGGTATTTGTAGTTTTATGTTAAGATG | biotin-AATCAAACAACCTCAAATCCTTTATAAC | AATTGGGTTTGTAGTAG         |
| <i>MEG3</i> :TSS-DMR         | TTGTGTTTGAATTTATTTTGTTF        | biotin-CCCCAAATTCTATAACAAATTACTCT   | GTGTTTGAATTTATTTTGTTF     |
| <i>SNURF</i> :TSS-DMR        | GTTATGGTAGTGGATTAGGGGGATGA     | biotin-CCTCCCCCTACCTCCCA            | ATAGTGGTGGGGTT            |
| <i>GNAS A/B</i> :TSS-DMR     | GGGATATTTGAGATTTTGAAAGAA       | biotin-AATACAAAACCTCCCCTACT         | GTTATTTTTTTTATTGGGAGGA    |
| <Sanger sequencing >         |                                |                                     |                           |
| <i>ZNF445</i> variant        | TGTCAGTGGTGTGGGAAAGA           | GAGGGGCATCTCTTCACTTG                |                           |
| <Quantitative real-time PCR> |                                |                                     |                           |
| q-PCR-1                      | AAGAGTGGGCTTCTCACTGG           | GCTGCACTATCCCATTAGGC                |                           |
| q-PCR-2                      | CTACCGTCTGCACCGAGAA            | GCTTCTCCTGGGTGTGAATC                |                           |
| q-PCR-3                      | TGGGAGACATACCTTTCCA            | CTCTGGCTGCAAGCTTCTTT                |                           |
| <Mutagenesis>                |                                |                                     |                           |
| <i>ZNF445</i> - c.2803C>T    | TTCCTCTTAGGACACAAAGTTGAGA      | GTGTCCTAAGAGGAAGACCGTGCAG           |                           |
| <Bisulfite sequencing>       |                                |                                     |                           |
| <i>MEG3-DLK1</i> :IG-DMR     | GTTTATTGGGTTGGGTTTTGTTAG       | ACCAATTACAATACCACAAAATTAC           |                           |
