# Supplementary material for: ZNF445: a homozygous truncating variant in a patient with Temple syndrome and multilocus imprinting disturbance
Source: PubMed Central journal article supplement (PMC8157728; doi:10.1186/s13148-021-01106-5), 2021-05-26
Supplement: 13148_2021_1106_MOESM6_ESM.pdf [file 13148_2021_1106_MOESM6_ESM.pdf]

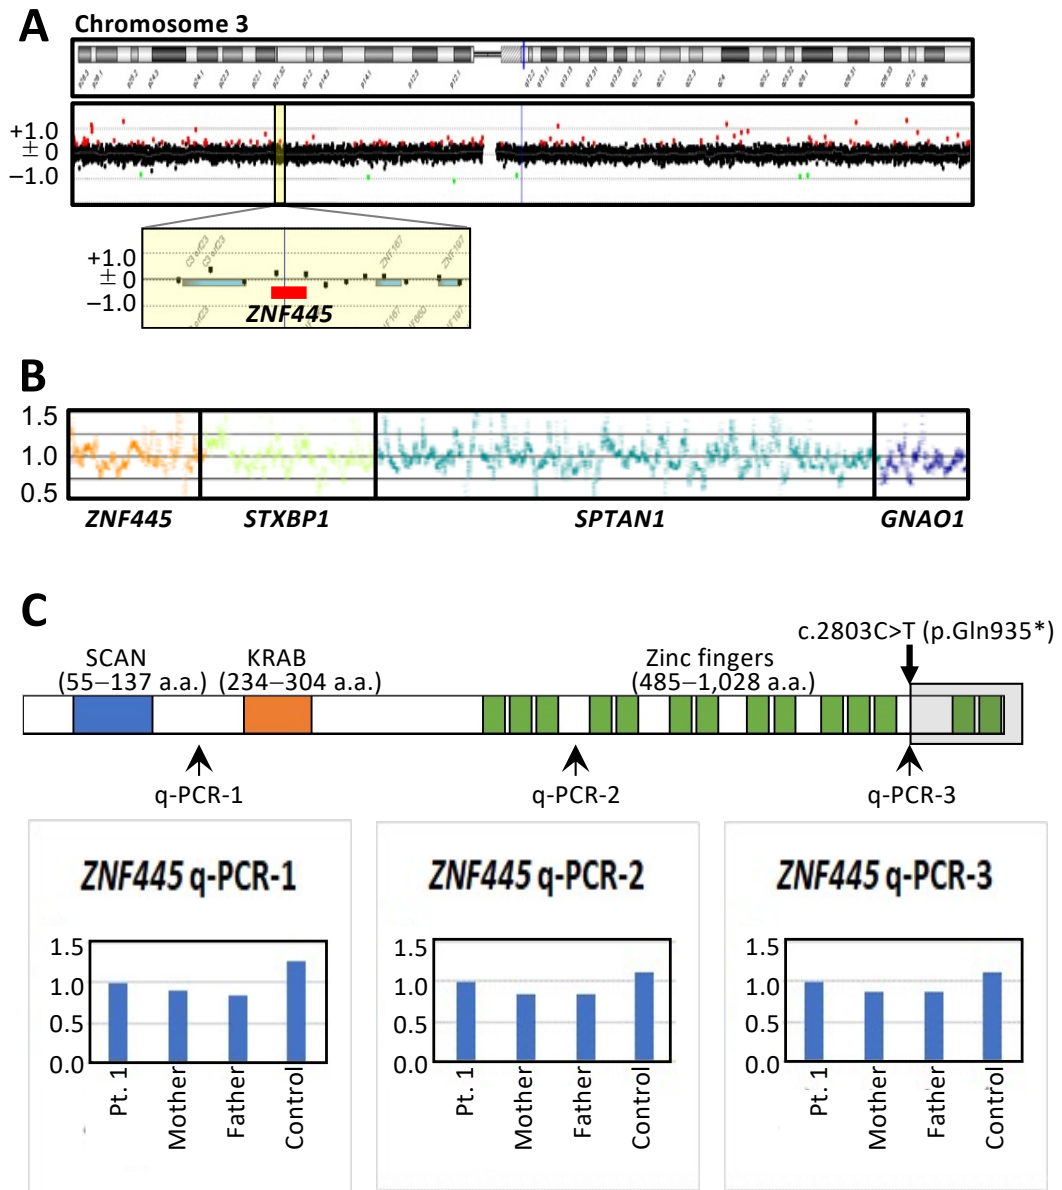

**Figure S1.** Exclusion of a heterozygous deletion involving *ZNF445* in patient 1.

A. Genomewide array comparative genomic hybridization analysis.

B. Exome sequencing-based CNV calling developed by Nord et al.<sup>1</sup>

C. Quantitative real-time PCR analysis for three positions on *ZNF445*.

#### Reference

1. Nord AS, Lee M, King MC, Walsh T. Accurate and exact CNV identification from targeted high-throughput sequence data. *BMC Genomics*. 2011;12:184.
